1 **Title: *Geobacter sulfurreducens* inner membrane cytochrome CbcBA controls**  
2 **electron transfer and growth yield near the energetic limit of respiration.**

3

4 **Running title:** Low redox potential *G. sulfurreducens* respiration.

5

6 **Authors:** Komal Joshi<sup>1,2</sup>, Chi Ho Chan<sup>1</sup>, Daniel R. Bond<sup>1,3</sup>

7

8 1. The BioTechnology Institute

9 2. Department of Biochemistry, Molecular Biology and Biophysics

10 3. Department of Plant and Microbial Biology, University of Minnesota Twin Cities,  
11 Minnesota, USA

12

13 **Corresponding author:** Daniel R. Bond, **Email:** [dbond@umn.edu](mailto:dbond@umn.edu)

14

15 **Keywords:** inner membrane cytochromes, redox potential, extracellular electron  
16 transfer, iron oxides, *Geobacter*

17 **Abstract:**

18 *Geobacter sulfurreducens* utilizes extracellular electron acceptors such as Mn(IV),  
19 Fe(III), syntrophic partners, and electrodes that vary from +0.4 to -0.3 V vs. Standard  
20 Hydrogen Electrode (SHE), representing a potential energy span that should require a  
21 highly branched electron transfer chain. Here we describe CbcBA, a *bc*-type cytochrome  
22 essential near the thermodynamic limit of respiration when acetate is the electron donor.  
23 Mutants lacking *cbcBA* ceased Fe(III) reduction at -0.21 V vs. SHE, could not transfer  
24 electrons to electrodes between -0.21 and -0.28 V, and could not reduce the final 10%  
25 - 35% of Fe(III) minerals. As redox potential decreased during Fe(III) reduction, *cbcBA*  
26 was induced with the aid of the regulator BccR to become one of the most highly  
27 expressed genes in *G. sulfurreducens*. Growth yield (CFU/mM Fe(II)) was 112% of WT  
28 in  $\Delta cbcBA$ , and deletion of *cbcL* (a different *bc*-cytochrome essential near -0.15 V) in  
29  $\Delta cbcBA$  increased yield to 220%. Together with ImcH, which is required at high redox  
30 potentials, CbcBA represents a third cytoplasmic membrane oxidoreductase in *G.*  
31 *sulfurreducens*. This expanding list shows how these important metal-reducing bacteria  
32 may constantly sense redox potential to adjust growth efficiency in changing  
33 environments.

34

35 **Introduction:**

36 Life generates cellular energy by linking electron donor oxidation to acceptor reduction.  
37 Each electron source and sink has an inherent affinity for electrons, or redox potential,  
38 which defines the maximum amount of energy available in such coupled reactions. For  
39 example, the difference in midpoint potentials of  $\text{NO}_3^-$  and Fe(III) is more than half a volt,  
40 which is enough to generate an additional ATP per electron when acetate is the donor  
41 ( $E^\circ$  of  $\text{NO}_3^-/\text{NO}_2^- = +0.43 \text{ V}$  vs.  $E^\circ$  of Fe(III) (oxyhydr)oxides/Fe(II)  $\sim -0.2 \text{ V}$  vs.  
42 Standard Hydrogen Electrode (SHE)) [1, 2, 3]. As the redox potential of soils and  
43 sediments can vary widely [4, 5, 6], adjusting electron transfer chains to use acceptors  
44 with more favorable potentials allows anaerobes to maximize growth in response to  
45 environmental conditions [3, 7, 8, 9].

46 The respiration of Fe(III) and Mn(IV) poses unique challenges. These elements  
47 exist as insoluble (oxyhydr)oxides near neutral pH, requiring diversion of electrons from  
48 inner membrane respiratory chains to electron-accepting surfaces outside the cell [10,  
49 11]. Additional complexity arises from the number of metal oxide polymorphs that exist in  
50 nature, with nearly 30 Mn oxides and 15 Fe oxides described, each with their own  
51 characteristic redox potential [12, 13, 14, 15]. While all of these could appear to the cell  
52 as similar extracellular electron sinks, the higher redox potential of Mn(IV) compared to  
53 Fe(III) oxides ( $E^\circ \sim +0.5$  to  $+0.3 \text{ V}$  for Mn(IV) vs.  $+0.1$  to  $-0.3 \text{ V}$  for Fe(III) vs. SHE)  
54 predicts that bacteria should be able to recognize and prefer specific metal forms.  
55 Sequential reduction of Mn(IV) before Fe(III) was observed in sediments as early as  
56 1966 [5] and in pure cultures of *Geobacter metallireducens* in 1988 [16], suggesting that  
57 biological mechanisms exist to differentiate between higher vs. lower potential materials  
58 outside the cell.

59           *Geobacter spp.* can reduce multiple oxidized metals [17, 18, 19, 20], directly  
60 transfer electrons to methanogens [21], and utilize electrode surfaces as electron  
61 acceptors [22]. The complex array of electron transfer proteins in *Geobacter spp.* may  
62 explain this flexibility, with multiple *c*-type cytochromes and extracellular appendages  
63 identified that facilitate reduction of extracellular compounds. In *G. sulfurreducens*, at  
64 least five triheme cytochromes are linked to periplasmic electron transfer [23, 24], five  
65 multi-protein cytochrome complexes aid electron transfer through the outer  
66 membrane [25], and both multiheme cytochrome nanowires and extracellular pili extend  
67 beyond the cell [26, 27, 28]. Some outer membrane cytochromes are necessary for  
68 reduction of specific oxyanions such as  $\text{SeO}_3^{2-}$  [29], or use of Fe(III) vs. electrode  
69 surfaces [25, 30], but none explain how *Geobacter* might adapt its energy generation  
70 strategy to changes in redox potential.

71           The putative oxidoreductases ImcH and CbcL provide a possible mechanism for  
72 potential-dependent electron transfer [31, 32]. *G. sulfurreducens* requires the  
73 cytoplasmic membrane-localized seven-heme *c*-type cytochrome ImcH to respire  
74 extracellular acceptors above redox potentials of  $-0.1$  V vs. SHE, and requires CbcL, a  
75 fusion of a diheme *b*-type cytochrome and a nine-heme *c*-type cytochrome, to use  
76 electron acceptors below  $-0.1$  V vs. SHE. As *imcH* and *cbcL* are constitutively  
77 expressed [25, 32], the requirement for each appears to be controlled by ambient redox  
78 potential, somehow allowing cells to switch from ImcH- to CbcL-dependent electron  
79 transfer as conditions change [31, 32].

80           Multiple lines of evidence suggest ImcH and CbcL are not the only *G.*  
81 *sulfurreducens* oxidoreductases capable of routing electrons into the periplasm. The  
82 redox potentials of subsurface environments and microbial fuel cell anodes where  
83 *Geobacter spp.* typically dominate can be as low as  $-0.3$  V vs. SHE, below the range

84 where ImcH or CbcL are essential [33, 34]. Incubations of  $\Delta cbcL$  with low-potential  
85 Fe(III) oxides such as goethite still produces Fe(II) [35], and  $\Delta cbcL$  attached to  
86 electrodes still shows electron transfer below  $-0.2$  V vs. SHE [32]. In addition, *Geobacter*  
87 genomes contain many uncharacterized gene clusters encoding a quinone oxidase-like  
88 *b*-type diheme cytochrome adjacent to a periplasmic multiheme *c*-type cytochrome,  
89 reminiscent of the two domains fused together in CbcL, and expression of some of these  
90 genes can be detected under metal-reducing conditions [36].

91         In this report, we identify CbcBA, a *bc*-type quinone oxidoreductase necessary  
92 for respiration near the thermodynamic limit of acetate oxidation. CbcBA is essential for  
93 extracellular metal and electrode reduction below  $-0.21$  V vs. SHE, and is found within  
94 nearly every sequenced *Geobacter* genome [37]. We also provide evidence that use of  
95 CbcBA leads to lower growth yields, and may primarily act as a non-energy-conserving  
96 route for electron disposal. Unique from *imcH* and *cbcL*, *cbcBA* requires a  $\sigma^{54}$ -dependent  
97 transcriptional activator for expression, and *cbcBA* is one of the most highly expressed  
98 genes during reduction of low potential Fe(III). Together, these cytochromes enable a  
99 branched electron transfer pathway that can operate at different redox potentials,  
100 allowing ImcH-dependent respiration when potential energy is plentiful, CbcL-dependent  
101 growth as energy becomes limiting, and use of CbcBA near the threshold able to support  
102 microbial life.

103

104 **Materials and Methods:**

105 **Bacterial strains and culture conditions**

106 All strains and plasmids used in this study are listed in Table 1. *G. sulfurreducens* strains  
107 and mutants were grown in a minimal medium (referred to as NB) containing 0.38  
108 g.L<sup>-1</sup> KCl, 0.2 g.L<sup>-1</sup> NH<sub>4</sub>Cl, 0.069 g.L<sup>-1</sup> NaH<sub>2</sub>PO<sub>4</sub>.H<sub>2</sub>O, 0.04 g.L<sup>-1</sup> CaCl<sub>2</sub>.2H<sub>2</sub>O, 0.2  
109 g.L<sup>-1</sup> MgSO<sub>4</sub>.7H<sub>2</sub>O, 10 mL of trace mineral mix, and buffered with 2 g.L<sup>-1</sup> of NaHCO<sub>3</sub>  
110 purged with N<sub>2</sub>:CO<sub>2</sub> (80:20) atmosphere, incubated at 30 °C. Trace mineral mix was  
111 composed of 1.5 g.L<sup>-1</sup> nitrilotriacetic acid as a chelator for growth, except when grown  
112 with Fe(III)-oxides, in which case minerals were prepared in 12.5 mL.L<sup>-1</sup> of 7.7 M HCl to  
113 a final concentration of 0.1 M HCl, 0.1 g.L<sup>-1</sup> MnCl<sub>2</sub>.4H<sub>2</sub>O, 0.5 g.L<sup>-1</sup> FeSO<sub>4</sub>.7H<sub>2</sub>O, 0.17  
114 g.L<sup>-1</sup> CoCl<sub>2</sub>.6H<sub>2</sub>O, 0.10 g.L<sup>-1</sup> ZnCl<sub>2</sub>, 0.03 g.L<sup>-1</sup> CuSO<sub>4</sub>.5H<sub>2</sub>O, 0.005 g.L<sup>-1</sup>  
115 AlK(SO<sub>4</sub>)<sub>2</sub>.12H<sub>2</sub>O, 0.005 g.L<sup>-1</sup> H<sub>3</sub>BO<sub>3</sub>, 0.09 g.L<sup>-1</sup> Na<sub>2</sub>MoO<sub>4</sub>, 0.05 g.L<sup>-1</sup> NiCl<sub>2</sub>, 0.02 g.L<sup>-1</sup>  
116 Na<sub>2</sub>WO<sub>4</sub>.2H<sub>2</sub>O, 0.10 g.L<sup>-1</sup> Na<sub>2</sub>SeO<sub>4</sub>. Routine growth was performed in acetate-fumarate  
117 NB medium (NBFA) containing 20 mM acetate as the carbon source and electron donor  
118 and 40 mM fumarate as the electron acceptor. For solid medium, 1.5% agar was added  
119 to acetate-fumarate medium for growth on plates in an anaerobic workstation  
120 (Microbiology International, Maryland) under N<sub>2</sub>: CO<sub>2</sub>: H<sub>2</sub> (75:20:5) atmosphere  
121 maintained at 30 °C. Every experiment was initiated by streaking fresh strains of *G.*  
122 *sulfurreducens* from -80 °C culture stocks. 200 µg.mL<sup>-1</sup> kanamycin was used for *G.*  
123 *sulfurreducens*, 100 µg.mL<sup>-1</sup> ampicillin and 50 µg.mL<sup>-1</sup> kanamycin for *Escherichia coli* as  
124 indicated.

125 **Strain construction and complementation**

126 Deletion constructs were designed based on a strategy previously described [38].  
127 Briefly, ~1 kb upstream and downstream region of *cbcBA* (GSU0593-0594), and *bccR*  
128 (GSU0598) were amplified using primers listed in Table 2. Amplified upstream and

129 downstream DNA fragments were fused using overlap extension PCR. Amplified fused  
130 DNA fragments were digested with restriction enzymes listed in Table 2, and ligated into  
131 digested and gel purified pk18mobsacB. The ligation product was transformed into  
132 UQ950 chemically competent cells. The resulting plasmid was sequence verified before  
133 transformation into S17-1 conjugation donor cells. Overnight grown S17-1 donor strain  
134 containing the plasmid was conjugated with *G. sulfurreducens* acceptor strain inside an  
135 anaerobic chamber on a sterile filter paper placed on an NBFA agar plate. After ~4 h,  
136 cells scraped from filters were streaked on NBFA agar plates containing kanamycin. The  
137 positive integrants were streaked on NBFA + 10% sucrose plates to select for the  
138 wildtype or deletion genotype. Colonies from NBFA + 10% sucrose plates were patched  
139 on NBFA and NBFA + 200  $\mu\text{g.mL}^{-1}$  to identify antibiotic sensitive, markerless deletion  
140 strains. The strains were verified by PCR for the gene deletion and final strains checked  
141 for off-site mutations via Illumina re-sequencing.

142         Complementation was performed using the method described in Hallberg *et*  
143 *al.* [39]. Complement strains were constructed by first cloning *cbcBA* (GSU0593-94),  
144 *cbcB* (GSU0593), or *cbcA* (GSU0594) gene into the pRK2Geo2 vector. The *cbcBA*  
145 cluster with native ribosomal binding sites was cloned under the control of its native  
146 promoter (GSU0597). The resulting vectors were sequence verified, then subcloned into  
147 pTn7c147 between the n7L and n7R regions. Newly subcloned pTn7 vectors were  
148 transformed in MFDpir chemically competent cells [40]. Any DNA between n7L and n7R  
149 regions is integrated downstream of the *glmS* (GSU0270) site, surrounded by strong  
150 terminators [41]. A helper plasmid pJMP1039 (a derivative of pTNS3) expressing  
151 recombinase TnsABCD in MFDpir cells was utilized to recognize n7L and n7R regions in  
152 pTn7 vectors [41], and integrate DNA onto *G. sulfurreducens* chromosome downstream  
153 of *glmS*. A triparental mating strategy was used to create complement strains.

154 Integrating genes onto the genome minimizes growth-rate and biofilm defects

155 encountered when using most plasmids in *G. sulfurreducens*.

### 156 **Cyclic voltammetry**

157 Three-electrode bioreactors contained 3 cm<sup>2</sup> 1500-grit polished polycrystalline graphite  
158 working electrodes (POCO AXF-5Q, TriGemini LLC, Illinois), platinum wire counter  
159 electrodes, Ag/AgCl reference electrodes [42, 43], and were autoclaved at 121 °C for 20  
160 min. Anoxic conditions were maintained by constantly flushing reactors with anoxic  
161 humidified N<sub>2</sub>: CO<sub>2</sub> (80:20) gas. Acetate (40 mM) served as the electron donor and  
162 carbon source, and poised electrodes (+0.24 V vs. SHE) served as the electron  
163 acceptor. Acetate-fumarate grown cells (acceptor limited, OD<sub>600</sub> ≈ 0.5) were inoculated  
164 at 25% v/v inoculation into 30 °C stirred reactors. A 16-channel potentiostat (Biologic  
165 Science Instruments, France) constantly recorded anodic current over time. Cyclic  
166 voltammetry was applied by forward scanning electrode potential from -0.55 V vs. SHE  
167 to +0.24 V vs. SHE, and reverse scanned back to -0.55 V vs. SHE at 1 mV/s for two  
168 scans [42].

### 169 **Growth with Fe(III) citrate**

170 Minimal medium containing 20 mM acetate and 55 mM Fe(III) citrate was used in  
171 anaerobic Balch tubes, or in bioreactors when redox potential was measured over time  
172 [35, 43]. Media were autoclaved at 121 °C and immediately removed to cool at room  
173 temperature in the dark. Anaerobic tubes containing Fe(III) citrate medium were  
174 inoculated at 1:100 v/v from stationary phase cultures (OD<sub>600</sub> ≈ 0.5) grown in NBFA. 0.1  
175 mL of sample was taken at regular intervals and dissolved in 0.9 mL of 0.5 N HCl. Fe(II)  
176 concentrations were measured using a ferrozine assay [44].

### 177 **Redox potential measurement**



178 For monitoring redox potential, bioreactors were used in Open Circuit Potential (OCP)  
179 mode. Short (1cm) electrochemically cleaned platinum wires were used as sensing  
180 electrodes with a Ag/AgCl reference (+0.21 V vs. SHE). Platinum was cleaned in 0.5 M  
181 H<sub>2</sub>SO<sub>4</sub> by holding the working electrode at +2.24 V vs. SHE, cycling electrode potential  
182 between +0.01 V and +1.34 V for 20 cycles and stopping at +1.34 V vs. SHE.

### 183 **Fe(III) oxide reduction**

184 Medium containing 20 mM acetate and either ~50 mM akaganeite or ~30 mM hydrous  
185 ferric oxide was supplemented with 0.69 g.L<sup>-1</sup> NaH<sub>2</sub>PO<sub>4</sub>.H<sub>2</sub>O (to prevent formation of  
186 crystalline Fe(III) (oxyhydr)oxide while autoclaving) [14]. Fresh akaganeite was  
187 synthesized by slowly adding 25% NaOH dropwise over the course of 1 h into a stirring  
188 solution of 0.4 M FeCl<sub>3</sub> to pH 7. The suspension was aged for at least one hour at pH 7,  
189 then washed with DI H<sub>2</sub>O via centrifugation. 1 mL of freshly synthesized akaganeite (β-  
190 FeOOH) (~0.5 M) was added to 9 mL medium with 20 mM acetate as the carbon source  
191 before autoclaving [14, 35]. Hydrous ferric oxide was synthesized first as  
192 schwertmannite (Fe<sub>8</sub>O<sub>8</sub>(OH)<sub>6</sub>(SO<sub>4</sub>).nH<sub>2</sub>O) by adding 5.5 mL of 30% hydrogen peroxide  
193 to a solution of 10 g.L<sup>-1</sup> FeSO<sub>4</sub>, then stirred overnight to stabilize. Schwertmannite solids  
194 were washed with DI H<sub>2</sub>O thrice by centrifugation. The resulting mineral was added to  
195 medium with 20 mM acetate as the carbon source before autoclaving. Autoclaving at  
196 neutral pH transforms the schwertmannite into ferrihydrite with an amorphous XRD-  
197 signature [14, 35, 39]. Iron oxide medium was inoculated with 1:100 v/v of cells  
198 (OD<sub>600</sub> ≈ 0.5) grown in NBFA medium. Samples (0.1 mL) were dissolved in 0.9 mL 0.5 N  
199 HCl, and stored in the dark before measurement via ferrozine assay.

### 200 **Transcriptomic analysis using RNA-seq**

201 Total RNA was extracted from *G. sulfurreducens* fumarate-grown cultures in exponential  
202 phase. For cells grown with Fe(III) citrate, RNA was extracted from cultures at

203 exponential growth phase when ~30% or ~70% of Fe(III) citrate was reduced. Cells were  
204 collected using vacuum filtration to minimize inhibition from Fe(III)/Fe(II) in the medium.  
205 Electrode biofilms were scraped from electrodes immediately after disconnecting them  
206 from the potentiostat. All cell pellets were washed in RNAprotect reagent (Qiagen) and  
207 stored at  $-80^{\circ}\text{C}$  before extraction using RNeasy with on column DNase treatment  
208 (Qiagen). Ribosomal RNA was depleted using Ribozero (Illumina) before sequencing on  
209 the Illumina HiSeq 2500 platform in 125-bp pair-ended mode. Residual ribosomal RNA  
210 sequences were removed using Bowtie2 [45] before analysis. Duplicate rRNA-depleted  
211 biological samples were analyzed for each strain and condition using Rockhopper [46],  
212 with our re-sequenced *G. sulfurreducens* genome as reference [38]. Expression was  
213 normalized by reads mapped by the upper quartile of gene expression values, and full  
214 RNA-seq data are in Supplementary table 1.

#### 215 **CFU and yield measurements**

216 Growth of *G. sulfurreducens* strains was measured by counting colony-forming units  
217 (CFUs). A drop plate method adapted from Herigstad *et al.* [47], was used to count cells  
218 on NBFA agar medium. Briefly, 100  $\mu\text{L}$  of samples were serially diluted 1:10 in liquid  
219 medium, and 10  $\mu\text{L}$  of each dilution was plated on NBFA agar plates inside an anaerobic  
220 chamber (Coy laboratory products, Michigan) with an  $\text{N}_2$ :  $\text{CO}_2$ :  $\text{H}_2$  (75:20:5) atmosphere.  
221 Total Fe(III) reduced was measured using a ferrozine assay, so cellular yield could be  
222 calculated as CFU per mM Fe(III) reduced as cells were actively growing.

223

224 **Results:**

225 **The *cbcBA* gene cluster encodes a *b*- and *c*-type cytochrome expressed late in**

226 **Fe(III) reduction.** The *G. sulfurreducens* genome contains at least six putative inner

227 membrane quinone oxidoreductase gene clusters. Five encode both *b*- and *c*-type

228 cytochrome domains: Cbc1 (GSU0274, *cbcL*), Cbc3 (GSU1648-GSU1650, *cbcVWX*),

229 Cbc4 (GSU0068-GSU0070, *cbcSTU*), Cbc5 (GSU0590-GSU0594, *cbcEDCBA*), Cbc6

230 (GSU2930-GSU2935, *cbcMNOPQR*) [48], and one contains only a multiheme *c*-type

231 cytochrome (GSU3259, *imcH*) [31]. The *b*- and *c*-type cytochrome CbcL (Cbc1) is

232 essential for growth below redox potentials of about  $-0.1$  V vs. SHE [32], while the *c*-

233 type cytochrome ImcH is essential for respiration as redox potential rises above this

Figure 1.

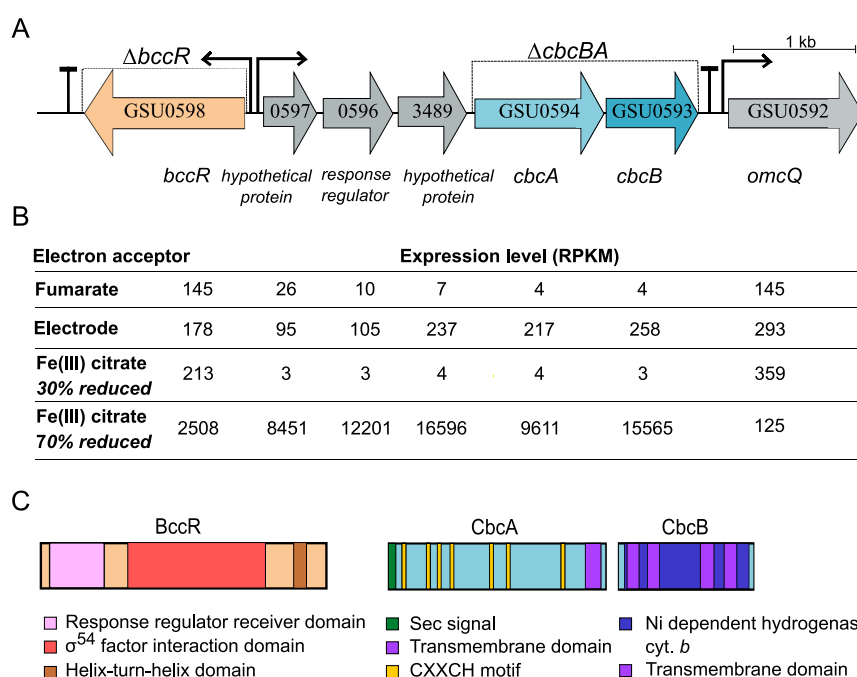

**Figure 1- Genetic organization, expression, and domain structure of the *cbcBA* region.** A. *cbcBA* is part of a five-gene operon divergently transcribed from a  $\sigma^{54}$ -dependent transcriptional regulator (*bccR*). B. Expression levels, as reads per kilobase mapped (RPKM), when growing exponentially with different electron acceptors: fumarate, electrodes, or Fe(III) citrate (30% vs. 70% Fe(III) reduced). The expression values correspond to the gene labels in panel A. See Supplementary Table 1 for full RNA-seq data. C. Predicted features and domain structure of BccR, CbcB, and CbcA.

234 point [31]. Among these *b*- and *c*-type cytochrome gene clusters, Cbc5 is the most  
235 conserved cytochrome-containing gene cluster among *Geobacter* species [37].

236 Bioinformatic [49, 50, 51] and transcriptomic analyses [25, 52] place *cbcBA* in an  
237 operon with a  $\sigma^{54}$ -dependent promoter upstream of GSU0597 and a transcriptional  
238 terminator downstream of *cbcB* (Figure 1A). This operon encodes two hypothetical  
239 proteins (GSU0597 and GSU3489), a RpoN-dependent response regulator (GSU0596),  
240 a quinone oxidoreductase-like di-heme *b*-type cytochrome (CbcB) [53], and a seven-  
241 heme *c*-type cytochrome (CbcA) (Figure 1C). An inner membrane localization of CbcBA  
242 is predicted by PSORT [54], with CbcB integrated into the inner membrane and CbcA  
243 exposed in the periplasm anchored by a C-terminal transmembrane domain. Cell  
244 fractionation studies also report a cytoplasmic membrane association of CbcA [55],  
245 implying that CbcBA is located at the inner membrane.

246 Divergently transcribed from this operon is GSU0598, a putative  $\sigma^{54}$ -dependent  
247 transcriptional regulator, which we have named *bccR* (for *bc*-type *cy*tochrome *re*gulator)  
248 (Figure 1A). BccR belongs to the RpoN-dependent family of regulators that bind  
249  $-12/-24$  elements [56]. BccR contains a response receiver domain, a  $\sigma^{54}$  factor  
250 interaction domain, and a C-terminal helix-turn-helix domain [57] (Figure 1C).

251 The *cbcBA* operon (GSU0597-GSU0593) had near zero expression when  
252 fumarate was the electron acceptor, but low expression was detected in electrode-grown  
253 biofilms [25] (Figure 1B). When growing with Fe(III) citrate as the electron acceptor,  
254 expression of the *cbcBA* operon remained low during the first 20 h of growth (Figure 1B),  
255 or as the first ~30% Fe(III) was reduced (Figure 2A). However, *cbcBA* was dramatically  
256 upregulated after 30 h of growth (Figure 1B), as ~70% of Fe(III) became reduced (Figure  
257 2A). The level of *cbcBA* expression (>12 000 RPKM) was higher than 99% of *G.*  
258 *sulfurreducens* genes at this stage (SI figure 1).

259 **CbcBA is essential for complete reduction of Fe(III) citrate.** To determine if CbcBA  
260 was involved in extracellular electron transfer, a markerless deletion of GSU0593-94  
261 ( $\Delta cbcBA$ ) was created. The  $\Delta cbcBA$  mutant did not show any defect with fumarate as  
262 the electron acceptor (SI figure 2). However, the extent of Fe(III) reduction by  $\Delta cbcBA$   
263 was lower. Mutants lacking *cbcBA* never reduced the final 8-10% of Fe(III) citrate (Figure  
264 2A), regardless of the amount of electron donor provided or length of incubation.

265 The putative quinone oxidoreductase ImcH is essential for reduction of high  
266 potential electron acceptors such as freshly prepared Fe(III) citrate [31], while the *bc*-  
267 cytochrome CbcL becomes essential as Fe(III) is reduced and redox potential drops [32,  
268 35]. As the type of Fe(III) reduction defect observed for  $\Delta cbcBA$  was similar to  $\Delta cbcL$ ,  
269 mutants lacking *cbcL* and *cbcBA* were directly compared. The  $\Delta cbcBA$  strain ceased  
270 reduction of Fe(III) after  $92.7 \pm 1.4\%$  (n=10) of Fe(III) citrate was reduced, whereas  
271  $\Delta cbcL$  only reduced  $84.6 \pm 1.0\%$  (n=11) of Fe(III) citrate (Figure 2A, 2B). This suggested  
272 that CbcBA became necessary in the final stages of Fe(III) reduction.

Figure 2.

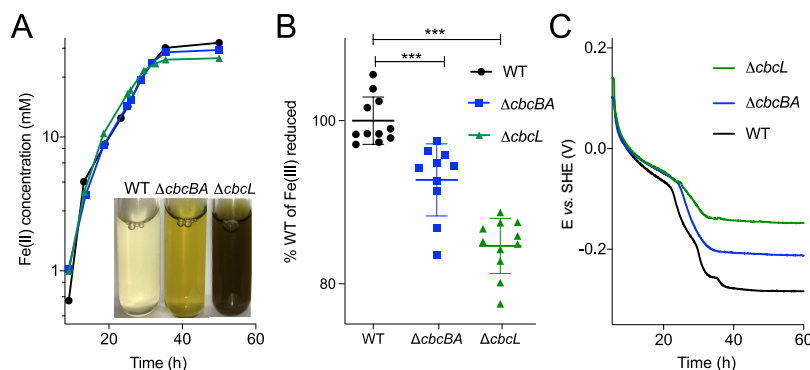

**Figure 2- Mutants lacking *cbcBA* or *cbcL* cannot reduce all available Fe(III) citrate, and *cbcBA* is required for reduction below  $-0.21$  V vs. SHE.** A. Fe(III) citrate reduction over time. Inset image shows the difference in endpoint Fe(III) citrate reduction by different strains. B.  $\Delta cbcBA$  reduces ~93% of Fe(III) citrate compared to WT, whereas  $\Delta cbcL$  reduces ~85% of Fe(III) citrate compared to WT. C. Redox potential recorded over time in the same medium, as cells reduce Fe(III) citrate. The  $\Delta cbcL$  mutant fails to lower redox potential below  $-0.15$  V vs. SHE whereas the  $\Delta cbcBA$  mutant fails to lower redox potential below  $-0.21$  V vs. SHE. All experiments were conducted in triplicate, and representative curves are shown in A and C (N  $\geq$  5). B shows end point values from individual experiments averaged with standard deviation reported as error bars (n  $\geq$  10). Two-tailed t-test was performed to calculate p-values.

273 **CbcBA is required for reduction of Fe(III) citrate below  $-0.21$  V vs. SHE.** Because  
274 the >3000-fold up-regulation of *cbcBA* occurred after more than half of Fe(III) citrate was  
275 reduced (SI figure 1), induction of *cbcBA* did not appear to be due to the presence of  
276 Fe(III) *per se*. To more accurately determine the energy available during each stage of  
277 Fe(III) reduction, we measured redox potential continuously during growth with a  
278 potentiostat [35, 58]. Redox potential titrations and voltammetry determined the midpoint  
279 potential of the Fe(II) citrate/Fe(III) citrate half-reaction in our medium to be  $-0.043$   
280 V vs. SHE (SI figure 3). This is lower than values calculated in literature, likely due to  
281 high levels of chelating carboxylic acids in commercial Fe(III) citrate combined with  
282 electron donors, creating bi- or tri-dentate complexes with lower redox potential than the  
283 1:1 ratios assumed in standard calculations [59, 60, 61].

284 When wildtype (WT) cells were inoculated into freshly prepared Fe(III) citrate  
285 (>99% oxidized), redox potential dropped rapidly from  $+0.15$  V, and stabilized days later  
286 at  $-0.27$  V vs. SHE when nearly 100% of Fe(III) was reduced. Considering the formal  
287 redox potential of  $\text{CO}_2/\text{acetate}$  is  $-0.28$  V, cells utilized nearly all the free energy  
288 available. In contrast,  $\Delta\text{cbcL}$  ceased Fe(III) reduction near  $-0.15$  V vs. SHE (equivalent  
289 to 38 mM Fe(III) reduced) [35]. Under the same conditions,  $\Delta\text{cbcBA}$  stabilized at  $-0.21$   
290 V vs. SHE (equivalent to  $\sim 46$  mM Fe(III) reduced). Each mutant produced these same  
291 endpoint potentials independent of inoculation size or incubation time (SI figure 4), or  
292 when the concentration of Fe(III) citrate was increased to 80 mM [35].

293 **Complementation of  $\Delta\text{cbcBA}$  requires both *cbcB* and *cbcA*.** To test if *cbcB* or *cbcA*  
294 alone were responsible for this inability to reduce Fe(III) below  $-0.21$  V vs. SHE, single  
295 genes were integrated into the chromosome under control of the *cbcBA* operon's  
296 promoter [39]. When  $\Delta\text{cbcBA}::\text{cbcB}$  or  $\Delta\text{cbcBA}::\text{cbcA}$  strains were grown with Fe(III)  
297 citrate, reduction still ceased at the same extent and redox potential (Figure 3A).

Figure 3.

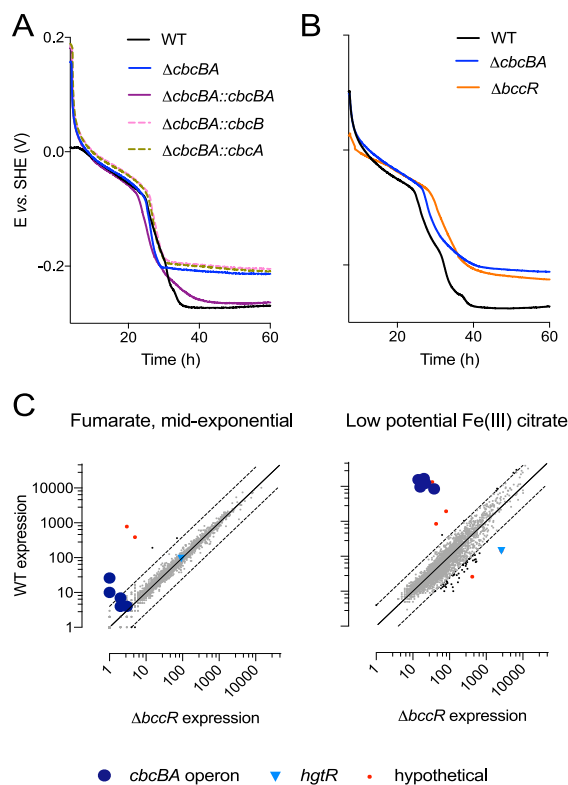

**Figure 3- Complementation of  $\Delta cbcBA$  requires expression of both *cbcB* and *cbcA*, and *bccR* is essential for induction of *cbcBA*.** A. Complementation with both *cbcB* and *cbcA* are required to fully restore Fe(III) reduction in  $\Delta cbcBA$ . B. Deletion of *bccR*, a  $\sigma^{54}$ -dependent transcriptional response regulator upstream of the *CbcBA* operon and comparison with  $\Delta cbcBA$ . C. Transcriptomic analysis of WT *G. sulfurreducens* vs.  $\Delta bccR$  grown with fumarate or Fe(III) citrate. Points above the 1:1 line indicate reduced expression due to deletion of *bccR*, points below the line had increased expression when *bccR* was deleted.

298

299 However, when both *cbcBA* genes were integrated and expressed in the  $\Delta cbcBA$  strain,  
 300 the extent of Fe(III) reduction was restored to WT levels (Figure 3A). Based on these  
 301 results, all subsequent experiments were conducted with mutants lacking both genes.

302 **BccR is necessary for expression of *cbcBA*.** A response regulator is divergently  
 303 transcribed upstream of *cbcBA* *bc*-type cytochrome operons in all examined *Geobacter*  
 304 genomes [25, 62]. When *bccR* (GSU0598) was deleted,  $\Delta bccR$  ceased reduction of  
 305 Fe(III) at  $-0.21$  V vs. SHE, the same potential as  $\Delta cbcBA$  (Figure 3B). RNAseq revealed  
 306 that expression of *cbcBA* was no longer upregulated in  $\Delta bccR$  during Fe(III) citrate

307 reduction (Figure 3C) consistent with BccR being an activator of the *cbcBA* operon.  
308 Deletion of *bccR* did not affect other putative quinone oxidoreductases, in particular  
309 *imcH* or *cbcL*, which were constitutively expressed at much more moderate (~500  
310 RPKM) levels.

311 While the largest effect of *bccR* deletion was downregulation of *cbcBA* operon  
312 (Figure 3C),  $\Delta bccR$  showed upregulation of *hgtR* (GSU3364) when Fe(III) was the  
313 electron acceptor. HgtR is a RpoN-dependent repressor involved in downregulating  
314 acetate oxidation when hydrogen is the electron donor [56, 63]. The increase in *hgtR*  
315 expression by more than 1 000x in  $\Delta bccR$  implies a possible role for HgtR in down-  
316 regulating the TCA cycle during reduction of Fe(III) as acetate oxidation becomes  
317 thermodynamically limited.

318 **Double mutants show that *imcH*, *cbcL*, and *cbcBA* are required within different**  
319 **redox potential windows.** If one inner membrane cytochrome is needed in order to  
320 lower redox potential enough to activate the next, then double and triple markerless  
321 deletion mutant strains should still show the phenotype of their dominant missing  
322 pathway. All single, double, and triple mutant strains lacking *imcH* failed to initiate Fe(III)  
323 citrate reduction when inoculated into fresh  $>+0.1$  V vs. SHE medium, and did not lower  
324 the redox potential more than 20 mV over the following 60 h (Figure 4). The dominance  
325 of  $\Delta imcH$  in all backgrounds corroborates data showing ImcH to be essential for electron  
326 transfer in fresh Fe(III) citrate, Mn(IV) oxide, and electrodes at redox potentials above 0  
327 V [31, 35], and showed that the presence or absence of *cbcBA* did not alter this  
328 behavior.

329 Like the single  $\Delta cbcL$  mutant, the  $\Delta cbcL \Delta cbcBA$  double mutant containing *imcH*  
330 initially reduced Fe(III), then ceased reduction at  $-0.15$  V vs. SHE. This provides  
331 additional evidence that ImcH can function down to a redox potential of  $-0.15$  V, and that



Figure 4.

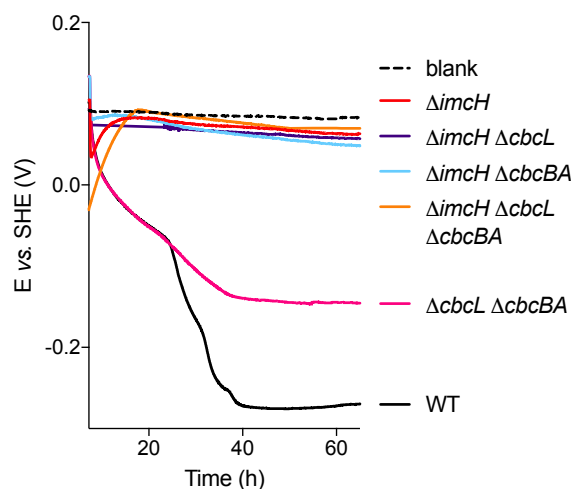

**Figure 4- Deletion of *imcH* prevents reduction of high potential Fe(III) citrate in all mutant backgrounds, while deletion of *cbcL* always prevents reduction beyond  $-0.15$  V vs. SHE.** Mutants lacking *imcH* ( $\Delta imcH$ ,  $\Delta imcH \Delta cbcL$ ,  $\Delta imcH \Delta cbcBA$ ,  $\Delta imcH \Delta cbcL \Delta cbcBA$ ) fail to reduce fresh Fe(III) citrate and cannot lower redox potential. The double mutant lacking *cbcL* and *cbcBA* ( $\Delta cbcL \Delta cbcBA$ ) fails to lower redox potential below  $-0.15$  V vs. SHE, similar to the  $\Delta cbcL$  single mutant. Representative curves from experiments conducted in triplicates are shown here.

332

333 only CbcL can lower redox potential beyond this point, regardless of whether CbcBA is  
334 present (Figure 4). The phenotype of  $\Delta cbcBA$  (Figure 2, 3) similarly implies that CbcL is  
335 essential until  $-0.21$  V vs. SHE, at which point CbcBA is required for electron transfer  
336 (Figure 3).

337 **Cyclic voltammetry detects a CbcBA-dependent electron transfer process with a**  
338 **midpoint potential of  $-0.24$  V vs. SHE.** All evidence up to this point that *cbcBA* was  
339 required at specific redox potentials was derived from soluble Fe(III) incubations, which  
340 could be non-physiological compared to environments where *G. sulfurreducens* uses a  
341 partner in syntrophy, or a solid electrode as the electron acceptor. To examine electron  
342 transfer in the absence of Fe(III), we grew *G. sulfurreducens* on graphite electrodes, and  
343 subjected the biofilms to cyclic voltammetry. During cyclic voltammetry, redox potential  
344 can be brought to a value too low to support acetate oxidation ( $-0.4$  V vs. SHE) to obtain  
345 a baseline. When electrode potential is slowly increased, electron transfer from adherent

346 cells is observed at a key onset potential as it becomes thermodynamically favorable,  
347 accelerates until a maximum electron transfer rate is reached, and follows the reverse  
348 trend as potential is decreased.

349 In theory, when a single event is rate-limiting in voltammetry, a Nernstian  
350 sigmoidal rise in current occurs over a ~100 mV window, rising most steeply at the  
351 potential that most strongly affects the oxidation state of a key redox center. The  
352 potential-dependent responses of *G. sulfurreducens* cells during voltammetry are more  
353 complex than one-event models, and instead display at least three overlapping  
354 processes [32, 42, 64, 65, 66]. These three inflection points can be easily identified by  
355 displaying the first derivative of current increase as a function of applied potential.

356 Prior work described a change in voltammetry near  $-0.10$  V vs. SHE  
357 when *cbcL* was deleted, which could be restored by *cbcL* complementation [32]. These  
358 experiments also detected a lower potential process independent of CbcL that increased  
359 with each subsequent voltammetry sweep. Impedance measurements by Yoho *et al.*  
360 [65] reported a similar low potential electron transfer process detectable within minutes  
361 of applying reducing electrode potentials. Based on our data, we hypothesized these  
362 unexplained features [32, 65] could be due to *cbcBA* activation during exposure to low  
363 potential electrodes.

364 To test this hypothesis, we first grew WT and  $\Delta cbcL$  biofilms on electrodes as  
365 electron acceptors at  $+0.24$  V vs. SHE, then subjected biofilms to voltammetry sweeps to  
366 reveal the low potential response below  $-0.2$  V, and confirm loss of the middle  $-0.1$  to  
367  $-0.15$  V process attributed to CbcL (Figure 5A). When *cbcBA* was deleted in the  $\Delta cbcL$   
368 background, the low potential electron transfer event disappeared, and all electron  
369 transfer below  $-0.15$  V was eliminated. In the single  $\Delta cbcBA$  mutant, only current below  
370  $-0.2$  V was eliminated, further linking *cbcBA* to activity in this low potential range (Figure

Figure 5.

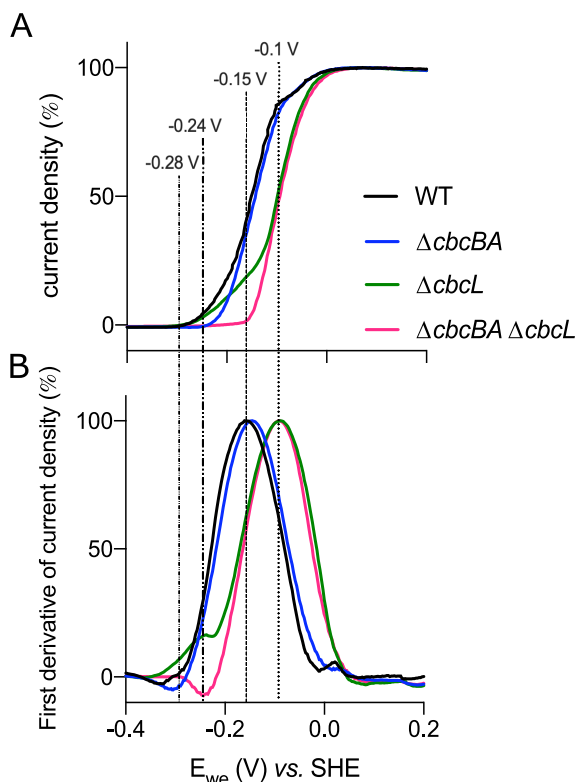

**Figure 5- Activation of a CbcBA-dependent electron transfer pathway at redox potentials below  $-0.21$  V vs. SHE.** A. *G. sulfurreducens* mutants grown on poised electrodes ( $+0.24$  V vs. SHE) to  $300\text{-}400 \mu\text{A}\cdot\text{cm}^{-2}$  subjected to cyclic voltammetry at  $1\text{ mV/s}$  scan rate in the presence of acetate. The  $\Delta cbcL$  mutant still showed a WT-like onset potential at  $-0.28$  V vs. SHE, and retained electron transfer at potentials below  $-0.2$  V. The  $\Delta cbcBA$  mutant lost this low potential ability and shifted to a more positive onset potential. B. First derivative of cyclic voltammetry data of mutant strains revealed clear differences in the potential where maximal rate of reduction occurs. The  $\Delta cbcL$  strain lacked the WT response at  $-0.15$  V vs. SHE, corresponding to reduction defect of low potential electron acceptors. The  $\Delta cbcBA \Delta cbcL$  double mutant lacked another low potential response at  $-0.24$  V vs. SHE. All experiments were conducted in duplicate, two scans were performed, and data from the reverse second scan was used for analysis.

371 5A). By plotting the first derivative of voltammetry data, regions where changes in  
372 potential caused the steepest response(s) could be identified. According to these data,  
373 deletion of *cbcBA* eliminated an electron transfer process between  $-0.28$  and  $-0.21$  V,  
374 with a midpoint potential of  $-0.24$  V vs. SHE.  
375 **CbcBA is essential for complete reduction of different Fe(III) (oxyhydr)oxides.** With  
376 the evidence that *G. sulfurreducens* not only required *cbcBA* for electron transfer to  
377 soluble metals, but also to electrode surfaces, we then asked if *cbcBA* was involved in

378 reduction of insoluble Fe(III) (oxyhydr)oxide particles found in the environment [13].  
379 While common forms such as ferrihydrite, akaganeite, goethite, and hematite all have  
380 the same chemical formula (FeOOH), these minerals differ greatly in calculated redox  
381 potentials [67]. For example, freshly synthesized hydrous ferric oxide possesses a  
382 relatively high redox potential (+0.1 to 0 V, depending on age and surface area) [15, 68],  
383 while more crystalline hematite can be as low as -0.2 to -0.3 V [69]. These differences  
384 could affect the relative importance of *cbcBA*, especially if a lower-potential form is  
385 available.

386 To compare insoluble Fe(III) minerals, two different forms representing  
387 progressively lower redox potential acceptors compared to Fe(III) citrate were  
388 synthesized. First, single mutants were incubated with a freshly precipitated hydrous  
389 ferric oxide, which has an estimated redox potential of ~0 V vs. SHE. Consistent with this  
390 acceptor having a potential near where both *ImcH* and *CbcL* have both been shown to  
391 operate,  $\Delta imcH$  initially reduced Fe(III) slowly, until Fe(II) accumulated to 1-2 mM, then  
392 accelerated to reduce nearly the same total Fe(III) as reduced by WT cells (Figure 6A).  
393 The mutant lacking *cbcL* reduced only 50% of Fe(III), and  $\Delta cbcBA$  reduced 90% of total  
394 Fe(III) compared to WT (Figure 6A). This pattern was similar to Fe(III) citrate, but  
395 showed increased importance of both *cbcL* and *cbcBA*.

396 The double deletion mutant  $\Delta imcH \Delta cbcBA$  (*CbcL*<sup>+</sup>) displayed the same lag as  
397 seen in  $\Delta imcH$  but then also failed to reduce the last 10-15% of Fe(III) as seen for  
398  $\Delta cbcBA$  (Figure 6A, 6C). The double mutant  $\Delta cbcL \Delta cbcBA$  (*ImcH*<sup>+</sup>) ceased reduction  
399 similar to  $\Delta cbcL$ , reducing 50% as much Fe(III) as WT (Figure 6C). Fe(III) reduction by  
400 double mutants aligned with the abilities of single mutants. Notably, even though  
401 concentrations of Fe(II) were much lower in hydrous ferric oxide incubations than in  
402 Fe(III) citrate, each cytochrome was necessary at the same phase of reduction,

Figure 6.

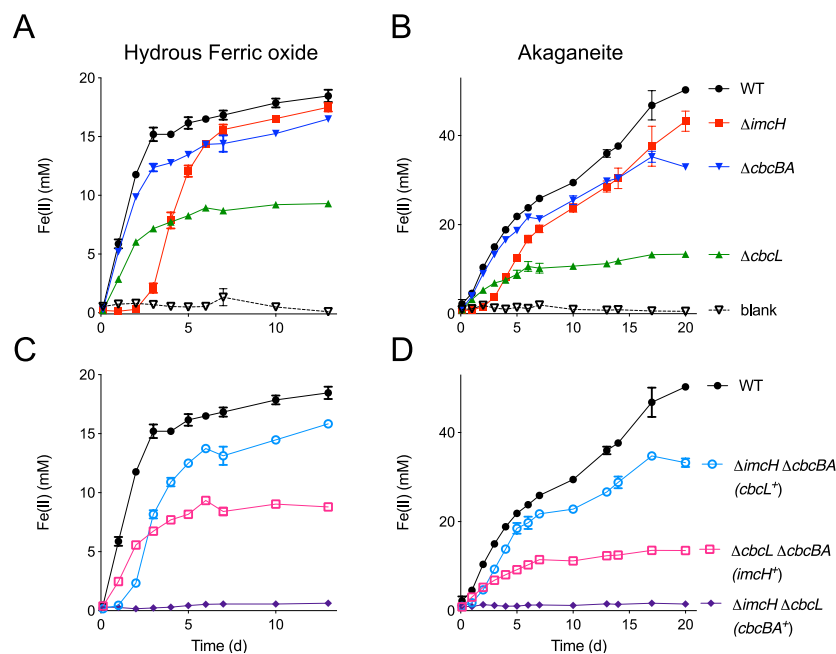

**Figure 6- Complete reduction of Fe(III) oxides also requires *cbcBA*, regardless of Fe(III) (oxyhydr)oxide mineral preparation method.** A and C. Reduction of hydrous ferric oxide, which has a formal redox potential lower than Fe(III) citrate, by single and double mutants lacking inner membrane cytochromes ( $\Delta imcH$ ,  $\Delta cbcL$ ,  $\Delta cbcBA$ ,  $\Delta imcH \Delta cbcL$ ,  $\Delta cbcBA \Delta cbcL$ , and  $\Delta cbcBA \Delta imcH$ ). A lag is observed by the  $\Delta imcH$  mutant, but up to 95% of ferric oxide is eventually reduced. All mutants lacking  $\Delta cbcL$  reduce 50% of Fe(III) oxide, and the  $\Delta cbcBA$  mutant reduced only 90%. B and D. Reduction of akaganeite, which has a lower formal redox potential than hydrous ferric oxide, showed shorter lag for  $\Delta imcH$ , and a larger defect for  $\Delta cbcL$  mutants who could reduce only 26% of the Fe(III). Similarly, a larger defect was observed for the  $\Delta cbcBA$  mutants in akaganeite. All experiments were conducted in triplicate, and the results are reported as mean values  $\pm$  standard deviation.

403 supporting the hypothesis that phenotypes were linked to the effective redox potential,  
 404 not absolute Fe(III) or Fe(II) concentrations.

405 When a lower potential Fe(III) mineral (akaganeite) was used, the lag by  $\Delta imcH$   
 406 was shorter (Figure 6B), consistent with less Fe(II) needing to accumulate to reduce  
 407 redox potential and activate CbcL. Mutants lacking *cbcL* initiated growth, but only  
 408 reduced 26% of Fe(III) compared to WT. Cells lacking *cbcBA* only reduced 65% of WT  
 409 Fe(III) (Figure 6B). The extent of Fe(III) reduction by the double mutant  $\Delta cbcL \Delta cbcBA$   
 410 ( $ImcH^+$ ) was the same as Fe(III) reduction by  $\Delta cbcL$ , and reduction by  $\Delta imcH \Delta cbcBA$   
 411 ( $CbcL^+$ ) was equivalent to reduction by the single mutant  $\Delta cbcBA$  (Figure 6D).

412           These results across different electron acceptors, Fe(III) forms, and Fe(II)  
413 concentrations were consistent with ImcH, CbcL, and CbcBA each having a role at a  
414 different redox potential. In all cases, ImcH was essential when redox potential was  
415 above  $\sim 0$  V, CbcL was needed for reduction of moderately low potential acceptors (to  
416 about  $-0.2$  V), and CbcBA was necessary for reduction closest to the thermodynamic  
417 limit. As lower potential electron acceptors such as akaganeite were used, CbcBA  
418 became more important for complete reduction.

419           While double mutants containing either *imcH* or *cbcL* demonstrated growth under  
420 at least one condition, double mutants containing only *cbcBA* failed to reduce Fe(III)  
421 (Figure 6C, 6D), and the same  $\Delta imcH \Delta cbcL$  mutant also failed to grow at any potential  
422 on electrodes (SI figure 5). The inability of cells containing only *cbcBA* to grow raised the  
423 possibility that CbcBA-dependent electron transfer conserves much less energy than  
424 when ImcH or CbcL is involved, possibly to the point where it cannot produce enough  
425 energy to support growth by *G. sulfurreducens* (SI figure 6). It also suggested that these  
426 are the only three options supporting Fe(III) reduction in this organism.

427       **Inner membrane cytochrome background affects growth yield.** Similar to how  
428 oxygen-limited *E. coli* induces separate terminal oxidases with a lower proton pumping  
429 stoichiometry, an explanation for different quinone oxidoreductase-like genes in  
430 *Geobacter* could be generation of variable amounts of proton motive force in response to  
431 environmental conditions [70, 71]. Support for this hypothesis can be found in slower  
432 growth rates of electrode-reducing  $\Delta imcH$  cells [31] and higher cell counts per mol Fe(II)  
433 in  $\Delta cbcL$  cells [35]. However, strains in these prior experiments still contained *cbcBA*,  
434 which could have been contributing to phenotypes.

435           If cells containing ImcH translocate more protons than when a CbcL or CbcBA-  
436 dependent pathway is in use, then forcing cells to only use ImcH and not transition to

Figure 7.

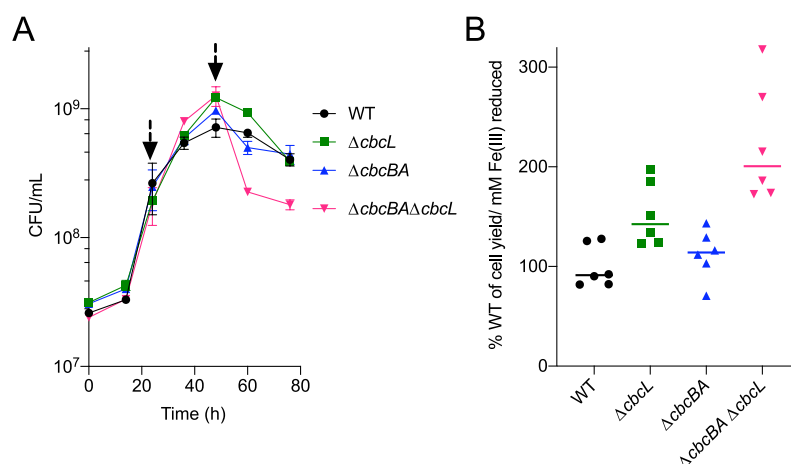

**Figure 7- Cell yield (cells per mol Fe(III) reduced) increases in mutants lacking *cbcL* and *cbcBA*.** A. Colony forming units (CFU/mL) measured from Fe(III) citrate-grown cultures. All mutants had similar initial growth rates, but mutants lacking *cbcBA* ( $\Delta cbcBA$ , and  $\Delta cbcBA \Delta cbcL$ ) showed a sharp decrease in viability compared to WT or  $\Delta cbcL$ . Arrows represent the time interval used to calculate yield. B. Mutants lacking *cbcL*, *cbcBA*, or both had higher cellular yield per unit Fe(III) reduced. The ImcH-only strain ( $\Delta cbcBA \Delta cbcL$ ) had the highest cellular yield, or 223% compared to WT, suggesting higher H<sup>+</sup>/e<sup>-</sup> compared to cultures where CbcL or CbcBA-dependent electron transfer initiated later in the growth curve. All experiments were conducted in triplicate (N=4), and data shown is represented as mean  $\pm$  standard error of mean (SEM).

437 use of the other pathways should increase ATP production and growth yield. In  
 438 agreement with this prediction, *cbcL* deletion led to higher cell numbers at the end of  
 439 Fe(III) reduction (Figure 7A). Cell counts increased further when both *cbcL* and *cbcBA*  
 440 were deleted. When accounting for how much Fe(III) was reduced, these differences  
 441 were even more pronounced (Figure 7B). Growth yield of  $\Delta cbcBA$  increased  $112 \pm 25\%$   
 442 compared to WT, yield of  $\Delta cbcL$  increased  $152 \pm 32\%$ , and yield of  $\Delta cbcBA \Delta cbcL$   
 443 (ImcH<sup>+</sup>) more than doubled, to  $223 \pm 59\%$  (Figure 7B). This supported higher net ATP  
 444 generation by ImcH-utilizing cells compared to those using CbcL or CbcBA.

445 While CbcL and CbcBA negatively affected yield, data showed that these genes  
 446 positively affect viability as Fe(III) became limiting. Near the end of Fe(III) reduction,  
 447 viability of  $\Delta cbcBA$  dropped over 50%, and  $\Delta cbcL$  dropped by 68%. Cells lacking both  
 448 *cbcL* and *cbcBA* had the worst survival, losing over 85% of cell viability within 24 h. A

449 decrease in proton translocation stoichiometry would not only lower growth yield, but  
450 would also allow *G. sulfurreducens* to continue conserving energy as Fe(III) reduction  
451 becomes less favorable. Because we have been unable to demonstrate growth with  
452 extracellular electron acceptors by *cbcBA*-only strains, and CbcBA is necessary when  
453 less than 0.07 V/electron is available (7 kJ/e<sup>-</sup>), we hypothesize that CbcBA participates  
454 in an electron disposal route that primarily meets maintenance requirements when  
455 conditions are near thermodynamic limits.



456 **Discussion:**

457 Long before the isolation of metal-reducing bacteria, higher potential Mn(IV) in  
458 sediments was shown to be reduced before lower potential Fe(III) [5]. In this report, we  
459 provide a molecular explanation for how a microorganism can choose the most  
460 thermodynamically beneficial acceptor amid a collection of minerals that lie beyond the  
461 cell membrane. Our data supports a model where redox potential controls which of three  
462 different inner membrane respiratory pathways are used, removing the need to sense  
463 the solubility or chemistry of complex extracellular metal oxides in a changing  
464 environment.

465 Data from this study, combined with prior genetic observations [31, 32, 35] are  
466 consistent with *G. sulfurreducens* utilizing ImcH to achieve high growth rates and yields  
467 when redox potential is above  $-0.1$  V. As redox potential decreases below this level,  
468 cells are increasingly dependent on CbcL, which lowers growth rate and yield but  
469 continues generating energy. As both of these cytochromes are constitutively expressed,  
470 this model predicts that CbcL should have a mechanism to prevent it from functioning at  
471 higher potentials. When redox potential approaches  $-0.2$  V vs. SHE, induction  
472 of *cbcBA* provides a means for cells to respire if CbcL cannot function, and the energy  
473 available to the organism approaches zero (Figure 4). The fact that *cbcBA* is not  
474 expressed until it is needed is consistent with it supporting the lowest growth yields.

475 Although CbcBA and CbcL both have type I *b*-type diheme quinone  
476 oxidoreductase domains, they share no sequence homology, and have a different  
477 number of transmembrane helices predicted to coordinate their hemes. CbcB has four  
478 transmembrane domains, with 3 conserved histidines linked to *b*-heme coordination,  
479 based on alignments with characterized diheme proteins. While CbcA is a separate  
480 protein, a fourth histidine for binding a *b*-type heme appears to be located in its C-

481 terminal domain. This pattern, where a *b*-type cytochrome is coordinated by a domain  
482 from a periplasmic enzyme is also seen in [NiFe] hydrogenases related to CbcB [72, 73].

483 CbcL has a different domain structure, with six transmembrane helices. One  
484 histidine capable of *b*-heme coordination is found in each of the first three  
485 transmembrane domains, but an additional two histidines arranged similar to those in  
486 formate dehydrogenase are in the fifth transmembrane domain [74]. The presence of  
487 five heme-coordinating residues could enable more than one *b*-heme binding  
488 configuration in CbcL, and provide a mechanism for preventing electron transfer until a  
489 key redox potential is reached. This hypothesis lacks precedent in other model systems  
490 and illustrates the need to biochemically characterize these putative quinone  
491 oxidoreductases.

492 Another feature of CbcBA is its consistent location in a regulated operon that is  
493 amongst one the most conserved cytochrome-encoding regions in *Geobacter*, occurring  
494 in 93 out of 96 *Geobacteraceae*, and 119 out of 134 Desulfuromonadales. Unlike *imcH*  
495 and *cbcL*, *cbcBA* is expressed only under low potential conditions (Figure 3). Our data  
496 here help explain studies that detected *cbcBA* expression in cells harvested after Fe(III)  
497 oxide reduction, but not higher-potential Mn(IV) oxide reduction [36]. Upregulation  
498 of *cbcBA* in electrode-grown biofilms is also consistent with *G. sulfurreducens* biofilms  
499 having low-potential regions farther from electrodes [25, 75, 76]. We predict that  
500 moderate *cbcBA* expression reported in electrode biofilms is an average of high  
501 expression in upper leaflets with low levels in the rest of the biofilm [76, 77]. Considering  
502 all of these studies, the radical change in *cbcBA* expression during growth with the same  
503 electron acceptor highlights a need to control or account for redox potential when cells  
504 are harvested for RNA extraction (SI figure 1).

505           Such fine-tuning of respiration is not found in all metal reducing organisms.  
506   *Shewanella oneidensis* uses one inner membrane quinone dehydrogenase, the  
507   tetraheme *c*-type cytochrome CymA [78] for reduction of acceptors that differ in redox  
508   potential by over 0.6 V, including fumarate, nitrate, DMSO, Fe(III), and Mn(IV) [79]. This  
509   may be explained by the fact that *Shewanella* partially oxidizes organic compounds to  
510   derive most of its ATP via substrate-level phosphorylation, and uses extracellular  
511   electron transfer primarily for electron disposal [80]. In contrast, *Geobacter* completely  
512   oxidizes substrates and requires chemiosmosis for ATP generation. Having multiple  
513   options for coupling electron flow to proton extrusion may allow *Geobacter* to utilize all  
514   available electrons and compete under such varied conditions as laboratory enrichments  
515   selecting for rapid growth, energy-limited aquifers selecting for persistence, and  
516   electrodes that create redox-stratified biofilms [75, 81, 82].

517           Nearly every important biological respiration can be easily identified by a highly  
518   conserved functional gene, such as *mcr* for methanogenesis, *dsr* for sulfate reduction,  
519   or *amo* for ammonia oxidation. Tools for molecular detection of metal-reducing bacteria  
520   are lacking, and prediction of extracellular electron transfer in uncultivated organisms is  
521   difficult, due to poor sequence similarity between multiheme cytochromes and poor  
522   conservation of cytochrome content between organisms [25, 37, 83, 84]. Unlike  
523   most *Geobacter c*-type cytochromes, the sequence of the *b*-type cytochrome CbcB is  
524   highly conserved, possibly because its donor (menaquinone) and acceptor (CbcA)  
525   remains more constant. This reduced rate of genetic drift allows CbcBA homologs near  
526   BccR-like regulators to be easily identified in other Deltaproteobacteria (such as metal-  
527   reducing *Anaeromyxobacter*) where the *b*-heme protein is typically annotated as  
528   ‘thiosulfate reductase’-like. Homologous *cbcBA* clusters annotated as hypothetical  
529   proteins are also present in metal-reducing genera such as the *Calditrichaeota*

530 (*Caldithrix*) and *Bacteroidetes* (*Prolixibacter*, *Marinilabiliales*, *Labilibaculum*),  
531 making *cbcBA* a possible marker for extracellular electron transfer in more distant phyla.  
532 Based on the presence of *cbcBA* homologs in genomes from uncultivated organisms  
533 within the *Verrucomicrobia*, and a family of *cbcB-cbcA* gene fusions  
534 within *Chloroflexi* genomes, undiscovered organisms capable of extracellular respiration  
535 still remain buried deep within anoxic sediments and metagenomic bins.

536

537

538 **Acknowledgements:**

539 We thank the University of Minnesota Genomics Center for RNA sample processing and  
540 sequencing, and the University of Minnesota Supercomputing Institute for bioinformatic  
541 resources. This work was supported by the Office of Naval research grants N00014-16-  
542 1-2194, and N00014-18-1-2632.

543

544 **Conflict of interest:**

545 The authors declare no conflict of interest.

546 **References:**

- 547 [1] Haddock, BA, Jones, CW (1977). Bacterial respiration. *Bacteriol Rev* 41(1): 47–99.
- 548 [2] Fischer, WR (1987). Standard potentials ( $E_o$ ) of iron(III) oxides under reducing  
549 conditions. *J Plant Nutr Soil Sci* 150(5): 286–289.
- 550 [3] Thauer, RK, Jungermann, K, Decker, K (1977). Energy conservation in  
551 chemotrophic anaerobic bacteria. *Bacteriol Rev* 41(1): 100–180.
- 552 [4] ZoBell, CE (1946). Studies on redox potential of marine sediments. *Am Assoc Pet*  
553 *Geol Bull* 30(4): 477–513.
- 554 [5] Takai, Y, Kamura, T (1966). The mechanism of reduction in waterlogged paddy soil.  
555 *Folia Microbiol* 11(4): 304–313.
- 556 [6] Bethke, CM, Sanford, RA, Kirk, MF, Jin, Q, Flynn, TM (2011). The thermodynamic  
557 ladder in geomicrobiology. *Am J Sci* 311(3): 183–210.
- 558 [7] Simon, J, van Spanning, RJM, Richardson, DJ (2008). The organisation of proton  
559 motive and non-proton motive redox loops in prokaryotic respiratory systems.  
560 *Biochim Biophys Acta - Bioenergetics* 1777(12): 1480–1490.
- 561 [8] Uden, G, Dünwald, P (2008). The aerobic and anaerobic respiratory chain of  
562 *Escherichia coli* and *Salmonella enterica*: enzymes and energetics. *EcoSal Plus*  
563 3(1).
- 564 [9] Buckel, W, Thauer, RK (2018). Flavin-based electron bifurcation, a new mechanism  
565 of biological energy coupling. *Chem Rev* 118(7): 3862–3886.
- 566 [10] Lovley, DR (1991). Dissimilatory Fe(III) and Mn(IV) reduction. *Microbiol Rev* 55(2):  
567 259–287.
- 568 [11] Nealson, KH, Saffarini, D (1994). Iron and manganese in anaerobic respiration:  
569 environmental significance, physiology, and regulation. *Annu Rev Microbiol* 48:  
570 311–343.

- 571 [12] Thamdrup, B (2000). Bacterial manganese and iron reduction in aquatic sediments.  
572 In Schink, B (Ed.) *Advances in Microbial Ecology, Springer US, Boston, MA* 41–84.
- 573 [13] Straub, KL, Benz, M, Schink, B (2001). Iron metabolism in anoxic environments at  
574 near neutral pH. *FEMS Microbiol Ecol* 34(3): 181–186.
- 575 [14] Cornell, RM, Schwertmann, U (2006). *The iron oxides: structure, properties,*  
576 *reactions, occurrences and uses. Wiley-VCH.*
- 577 [15] Navrotsky, A, Mazeina, L, Majzlan, J (2008). Size-driven structural and  
578 thermodynamic complexity in iron oxides. *Science* 319(5870): 1635–1638.
- 579 [16] Lovley, DR, Phillips, EJP (1988). Manganese inhibition of microbial iron reduction in  
580 anaerobic sediments. *Geomicrobiol J* 6(3–4): 145–155.
- 581 [17] Lovley, DR, Phillips, EJP (1988). Novel mode of microbial energy-metabolism -  
582 organic-carbon oxidation coupled to dissimilatory reduction of iron or manganese.  
583 *Appl Environ Microbiol* 54(6): 1472–1480.
- 584 [18] Lovley, DR, Giovannoni, SJ, White, DC, Champine, JE, Phillips, EJP, Gorby, YA, *et*  
585 *al.* (1993). *Geobacter metallireducens* gen. nov. sp. nov., a microorganism capable  
586 of coupling the complete oxidation of organic compounds to the reduction of iron  
587 and other metals. *Arch Microbiol* 159(4): 336–344.
- 588 [19] Caccavo, F, Lonergan, DJ, Lovley, DR, Davis, M, Stolz, JF, McInerney, MJ (1994).  
589 *Geobacter sulfurreducens* sp. nov., a hydrogen- and acetate-oxidizing dissimilatory  
590 metal-reducing microorganism. *Appl Environ Microbiol* 60(10): 3752–3759.
- 591 [20] Anderson, RT, Vrionis, HA, Ortiz-Bernad, I, Resch, CT, Long, PE, Dayvault, R, *et*  
592 *al.* (2003). Stimulating the *in situ* activity of *Geobacter* species to remove uranium  
593 from the groundwater of a uranium-contaminated aquifer. *Appl Environ Microbiol*  
594 69(10): 5884–5891.

- 595 [21] Rotaru, AE, Shrestha, PM, Liu, F, Markovaite, B, Chen, S, Nevin, KP, *et al.* (2014).  
596 Direct interspecies electron transfer between *Geobacter metallireducens* and  
597 *Methanosarcina barkeri*. *Appl Environ Microbiol* 80(15): 4599–4605.
- 598 [22] Bond, DR, Lovley, DR (2003). Electricity production by *Geobacter sulfurreducens*  
599 attached to electrodes. *Appl Environ Microbiol* 69(3): 1548–1555.
- 600 [23] Lloyd, JR, Leang, C, Hodges Myerson, AL, Coppi, MV, Cuifo, S, Methe, B, *et al.*  
601 (2003). Biochemical and genetic characterization of PpcA, a periplasmic *c*-type  
602 cytochrome in *Geobacter sulfurreducens*. *Biochem J* 369(Pt 1): 153–161.
- 603 [24] Shelobolina, ES, Coppi, MV, Korenevsky, AA, DiDonato, LN, Sullivan, SA, Konishi,  
604 H, *et al.* (2007). Importance of *c*-type cytochromes for U(VI) reduction by *Geobacter*  
605 *sulfurreducens*. *BMC Microbiol* 7: 16.
- 606 [25] Otero, FJ, Chan, CH, Bond, DR (2018). Identification of different putative outer  
607 membrane electron conduits necessary for Fe(III) citrate, Fe(III) oxide, Mn(IV) oxide,  
608 or electrode reduction by *Geobacter sulfurreducens*. *J Bacteriol* 200(19).
- 609 [26] Wang, F, Gu, Y, O'Brien, JP, Yi, SM, Yalcin, SE, Srikanth, V, *et al.* (2019).  
610 Structure of microbial nanowires reveals stacked hemes that transport electrons  
611 over micrometers. *Cell* 177(2): 361–369.e10.
- 612 [27] Yalcin, SE, O'Brien, JP, Gu, Y, Reiss, K, Yi, SM, Jain, R, *et al.* (2020). Electric field  
613 stimulates production of highly conductive microbial OmcZ nanowires. *Nat Chem*  
614 *Bio* 16(10): 1136–1142.
- 615 [28] Reguera, G, McCarthy, KD, Mehta, T, Nicoll, JS, Tuominen, MT, Lovley, DR  
616 (2005). Extracellular electron transfer via microbial nanowires. *Nature* 435(7045):  
617 1098–1101.

- 618 [29] Jahan, MI, Tobe, R, Mihara, H (2018). Characterization of a novel porin-like protein,  
619 Extl, from *Geobacter sulfurreducens* and its implication in the reduction of selenite  
620 and tellurite. *Int J Mol Sci* 19(3).
- 621 [30] Chan, CH, Levar, CE, Jiménez-Otero, F, Bond, DR (2017). Genome scale  
622 mutational analysis of *Geobacter sulfurreducens* reveals distinct molecular  
623 mechanisms for respiration and sensing of poised electrodes versus Fe(III) oxides. *J*  
624 *Bacteriol* 199(19).
- 625 [31] Levar, CE, Chan, CH, Mehta-Kolte, MG, Bond, DR (2014). An inner membrane  
626 cytochrome required only for reduction of high redox potential extracellular electron  
627 acceptors. *mBio* 5(6): e02 034–14.
- 628 [32] Zacharoff, L, Chan, CH, Bond, DR (2016). Reduction of low potential electron  
629 acceptors requires the CbcL inner membrane cytochrome of *Geobacter*  
630 *sulfurreducens*. *Bioelectrochemistry* 107: 7–13.
- 631 [33] Finkelstein, DA, Tender, LM, Zeikus, JG (2006). Effect of electrode potential on  
632 electrode-reducing microbiota. *Environ Sci Technol* 40(22): 6990–6995.
- 633 [34] Logan, BE, Hamelers, B, Rozendal, R, Schröder, U, Keller, J, Freguia, S, *et al.*  
634 (2006). Microbial fuel cells: methodology and technology. *Environ Sci Technol*  
635 40(17): 5181–5192.
- 636 [35] Levar, CE, Hoffman, CL, Dunshee, AJ, Toner, BM, Bond, DR (2017). Redox  
637 potential as a master variable controlling pathways of metal reduction by *Geobacter*  
638 *sulfurreducens*. *ISME J* 11(3): 741–752.
- 639 [36] Aklujkar, M, Coppi, MV, Leang, C, Kim, BC, Chavan, MA, Perpetua, LA, *et al.*  
640 (2013). Proteins involved in electron transfer to Fe(III) and Mn(IV) oxides by  
641 *Geobacter sulfurreducens* and *Geobacter uraniireducens*. *Microbiology* 159(Pt 3):  
642 515–535.



- 643 [37] Butler, JE, Young, ND, Lovley, DR (2010). Evolution of electron transfer out of the  
644 cell: comparative genomics of six *Geobacter* genomes. *BMC Genomics* 11: 40.
- 645 [38] Chan, CH, Levar, CE, Zacharoff, L, Badalamenti, JP, Bond, DR (2015). Scarless  
646 genome editing and stable inducible expression vectors for *Geobacter*  
647 *sulfurreducens*. *Appl Environ Microbiol* 81(20): 7178–7186.
- 648 [39] Hallberg, ZF, Chan, CH, Wright, TA, Kranzusch, PJ, Doxzen, KW, Park, JJ, *et al.*  
649 (2019). Structure and mechanism of a Hypr GGDEF enzyme that activates cGAMP  
650 signaling to control extracellular metal respiration. *eLife* 8: e43 959.
- 651 [40] Ferrières, L, Hémerly, G, Nham, T, Guérout, AM, Mazel, D, Beloin, C, *et al.* (2010).  
652 Silent mischief: Bacteriophage Mu insertions contaminate products of *Escherichia*  
653 *coli* random mutagenesis performed using suicidal transposon delivery plasmids  
654 mobilized by broad-host-range RP4 conjugative machinery. *J Bacteriol* 192(24):  
655 6418–6427.
- 656 [41] Peters, JM, Koo, BM, Patino, R, Heussler, GE, Hearne, CC, Qu, J, *et al.* (2019).  
657 Enabling genetic analysis of diverse bacteria with Mobile-CRISPRi. *Nat Microbiol*  
658 4(2): 244–250.
- 659 [42] Marsili, E, Rollefson, JB, Baron, DB, Hozalski, RM, Bond, DR (2008). Microbial  
660 biofilm voltammetry: direct electrochemical characterization of catalytic electrode-  
661 attached biofilms. *Appl Environ Microbiol* 74(23): 7329–7337.
- 662 [43] Joshi, K, Kane, AL, Kotloski, NJ, Gralnick, JA, Bond, DR (2019). Preventing  
663 hydrogen disposal increases electrode utilization efficiency by *Shewanella*  
664 *oneidensis*. *Front Energy Res* 7(95).
- 665 [44] Lovley, DR, Phillips, EJP (1987). Rapid assay for microbially reducible ferric iron in  
666 aquatic sediments. *Appl Environ Microbiol* 53(7): 1536–1540.

- 667 [45] Langmead, B, Salzberg, SL (2012). Fast gapped-read alignment with Bowtie 2. *Nat*  
668 *Methods* 9(4): 357–359.
- 669 [46] McClure, R, Balasubramanian, D, Sun, Y, Bobrovskyy, M, Sumbly, P, Genco, CA, *et*  
670 *al.* (2013). Computational analysis of bacterial RNA-Seq data. *Nucleic Acids Res*  
671 41(14): e140.
- 672 [47] Herigstad, B, Hamilton, M, Heersink, J (2001). How to optimize the drop plate  
673 method for enumerating bacteria. *J Microbiol Methods* 44(2): 121–129.
- 674 [48] Methé, BA, Nelson, KE, Eisen, JA, Paulsen, IT, Nelson, W, Heidelberg, JF, *et al.*  
675 (2003). Genome of *Geobacter sulfurreducens*: Metal reduction in subsurface  
676 environments. *Science* 302(5652): 1967–1969.
- 677 [49] Qu, Y, Brown, P, Barbe, JF, Puljic, M, Merino, E, Adkins, RM, *et al.* (2009). GSEL  
678 version 2, an online genome-wide query system of operon organization and  
679 regulatory sequence elements of *Geobacter sulfurreducens*. *OMICS* 13(5): 439–  
680 449.
- 681 [50] Krushkal, J, Leang, C, Barbe, JF, Qu, Y, Yan, B, Puljic, M, *et al.* (2009). Diversity of  
682 promoter elements in a *Geobacter sulfurreducens* mutant adapted to disruption in  
683 electron transfer. *Funct Integr Genomics* 9(1): 15–25.
- 684 [51] Yan, B, Núñez, C, Ueki, T, Esteve-Núñez, A, Puljic, M, Adkins, RM, *et al.* (2006).  
685 Computational prediction of RpoS and RpoD regulatory sites in *Geobacter*  
686 *sulfurreducens* using sequence and gene expression information. *Gene* 384: 73–95.
- 687 [52] Holmes, DE, Chaudhuri, SK, Nevin, KP, Mehta, T, Methé, BA, Liu, A, *et al.* (2006).  
688 Microarray and genetic analysis of electron transfer to electrodes in *Geobacter*  
689 *sulfurreducens*. *Environ Microbiol* 8(10): 1805–1815.

- 690 [53] Krogh, A, Larsson, B, von Heijne, G, Sonnhammer, EL (2001). Predicting  
691 transmembrane protein topology with a hidden Markov model: application to  
692 complete genomes. *J Mol Biol* 305(3): 567–580.
- 693 [54] Yu, NY, Wagner, JR, Laird, MR, Melli, G, Rey, S, Lo, R, *et al.* (2010). PSORTb 3.0:  
694 Improved protein subcellular localization prediction with refined localization  
695 subcategories and predictive capabilities for all prokaryotes. *Bioinformatics* 26(13):  
696 1608–1615.
- 697 [55] Ding, YHR, Hixson, KK, Giometti, CS, Stanley, A, Esteve-Núñez, A, Khare, T, *et al.*  
698 (2006). The proteome of dissimilatory metal-reducing microorganism *Geobacter*  
699 *sulfurreducens* under various growth conditions. *Biochim Biophys Acta- Proteins*  
700 *and Proteomics* 1764(7): 1198–1206.
- 701 [56] Leang, C, Krushkal, J, Ueki, T, Puljic, M, Sun, J, Juárez, K, *et al.* (2009). Genome-  
702 wide analysis of the RpoN regulon in *Geobacter sulfurreducens*. *BMC Genomics* 10:  
703 331.
- 704 [57] Blum, M, Chang, HY, Chuguransky, S, Grego, T, Kandasamy, S, Mitchell, A, *et al.*  
705 (2021). The InterPro protein families and domains database: 20 years on. *Nucleic*  
706 *Acids Res* 49(D1): D344–D354.
- 707 [58] Brasca, M, Morandi, S, Lodi, R, Tamburini, A (2007). Redox potential to  
708 discriminate among species of lactic acid bacteria. *J Appl Microbiol* 103(5): 1516–  
709 1524.
- 710 [59] Vukosav, P, Mlakar, M, Tomišić, V (2012). Revision of iron(III)–citrate speciation in  
711 aqueous solution. Voltammetric and spectrophotometric studies. *Anal Chim Acta*  
712 745: 85–91.

- 713 [60] Adam, FI, Bounds, PL, Kissner, R, Koppenol, WH (2015). Redox properties and  
714 activity of iron–citrate complexes: Evidence for redox cycling. *Chem Res Toxicol*  
715 28(4): 604–614.
- 716 [61] Königsberger, LC, Königsberger, E, May, PM, Hefter, GT (2000). Complexation of  
717 iron(III) and iron(II) by citrate. Implications for iron speciation in blood plasma. *J*  
718 *Inorg Biochem* 78(3): 175–184.
- 719 [62] Baerends, RJ, Smits, WK, de Jong, A, Hamoen, LW, Kok, J, Kuipers, OP (2004).  
720 Genome2D: a visualization tool for the rapid analysis of bacterial transcriptome  
721 data. *Genome Biol* 5(5): R37.
- 722 [63] Ueki, T, Lovley, DR (2010). Genome-wide gene regulation of biosynthesis and  
723 energy generation by a novel transcriptional repressor in *Geobacter* species.  
724 *Nucleic Acids Res* 38(3): 810–821.
- 725 [64] Richter, H, Nevin, KP, Jia, H, Lowy, DA, Lovley, DR, Tender, LM (2009). Cyclic  
726 voltammetry of biofilms of wild type and mutant *Geobacter sulfurreducens* on fuel  
727 cell anodes indicates possible roles of OmcB, OmcZ, type IV pili, and protons in  
728 extracellular electron transfer. *Energy Environ Sci* 2(5): 506–516.
- 729 [65] Yoho, RA, Popat, SC, Torres, CI (2014). Dynamic potential-dependent electron  
730 transport pathway shifts in anode biofilms of *Geobacter sulfurreducens*.  
731 *ChemSusChem* 7(12): 3413–3419.
- 732 [66] Marsili, E, Sun, J, Bond, D (2010). Voltammetry and growth physiology of  
733 *Geobacter sulfurreducens* biofilms as a function of growth stage and imposed  
734 electrode potential. *Electroanalysis* 22(7-8): 865–874.
- 735 [67] Bonneville, S, Behrends, T, Van Cappellen, P (2009). Solubility and dissimilatory  
736 reduction kinetics of iron(III) oxyhydroxides: A linear free energy relationship.  
737 *Geochim Cosmochim Acta* 73(18): 5273–5282.

- 738 [68] Majzlan, J, Navrotsky, A, Schwertmann, U (2004). Thermodynamics of iron oxides:  
739 Part III. Enthalpies of formation and stability of ferrihydrite (Fe(OH)<sub>3</sub>),  
740 schwertmannite (FeO(OH)<sub>3/4</sub>(SO<sub>4</sub>)<sub>1/8</sub>), and ε-Fe<sub>2</sub>O<sub>3</sub>. *Geochim Cosmochim Acta* 713  
741 68(5): 1049–1059.
- 742 [69] Majzlan, J (2012). Minerals and aqueous species of iron and manganese as  
743 reactants and products of microbial metal respiration. In Gescher, J, Kappler, A  
744 (Eds.) *Microbial Metal Respiration, Springer Berlin Heidelberg, Berlin, Heidelberg* 1–  
745 28.
- 746 [70] Ingledew, WJ, Poole, RK (1984). The respiratory chains of *Escherichia coli*.  
747 *Microbiol Rev* 48(3): 222–271.
- 748 [71] Bekker, M, Vries, Sd, Beek, AT, Hellingwerf, KJ, Mattos, MJTd (2009). Respiration  
749 of *Escherichia coli* can be fully uncoupled via the nonelectrogenic terminal  
750 cytochrome *bd-II* oxidase. *J Bacteriol* 191(17): 5510–5517.
- 751 [72] Gross, R, Simon, J, Lancaster, CRD, Kröger, A (1998). Identification of histidine  
752 residues in *Wolinella succinogenes* hydrogenase that are essential for menaquinone  
753 reduction by H<sub>2</sub>. *Mol Microbiol* 30(3): 639–646.
- 754 [73] Gross, R, Pisa, R, Sängler, M, Lancaster, CRD, Simon, J (2004). Characterization  
755 of the menaquinone reduction site in the diheme cytochrome *b* membrane anchor of  
756 *Wolinella succinogenes* NiFe-hydrogenase. *J Biol Chem* 279(1): 274–281.
- 757 [74] Jormakka, M, Törnroth, S, Byrne, B, Iwata, S (2002). Molecular basis of proton  
758 motive force generation: structure of formate dehydrogenase-N. *Science* 295(5561):  
759 1863–1868.
- 760 [75] Chadwick, GL, Otero, FJ, Gralnick, JA, Bond, DR, Orphan, VJ (2019). NanoSIMS  
761 imaging reveals metabolic stratification within current-producing biofilms. *Proc Natl*  
762 *Acad Sci U S A* 116(41): 20 716–20 724.

- 763 [76] Krige, A, Ramser, K, Sjöblom, M, Christakopoulos, P, Rova, U (2020). A new  
764 approach for evaluating electron transfer dynamics by using *in situ* resonance  
765 raman microscopy and chronoamperometry in conjunction with a dynamic model.  
766 *Appl Environ Microbiol* 86(20): 320–327.
- 767 [77] Lebedev, N, Strycharz-Glaven, SM, Tender, LM (2014). Spatially resolved confocal  
768 resonant Raman microscopic analysis of anode-grown *Geobacter sulfurreducens*  
769 biofilms. *Chemphyschem* 15(2): 320–327.
- 770 [78] Myers, CR, Myers, JM (1997). Cloning and sequence of *cymA*, a gene encoding a  
771 tetraheme cytochrome *c* required for reduction of iron(III), fumarate, and nitrate by  
772 *Shewanella putrefaciens* MR-1. *J Bacteriol* 179(4): 1143–1152.
- 773 [79] Marritt, SJ, Lowe, TG, Bye, J, McMillan, DGG, Shi, L, Fredrickson, J, *et al.* (2012).  
774 A functional description of CymA, an electron-transfer hub supporting anaerobic  
775 respiratory flexibility in *Shewanella*. *Biochem J* 444(3): 465–474.
- 776 [80] Hunt, KA, Flynn, JM, Naranjo, B, Shikhare, ID, Gralnick, JA (2010). Substrate-level  
777 phosphorylation is the primary source of energy conservation during anaerobic  
778 respiration of *Shewanella oneidensis* strain MR-1. *J Bacteriol* 192(13): 3345–3351.
- 779 [81] Snider, RM, Strycharz-Glaven, SM, Tsoi, SD, Erickson, JS, Tender, LM (2012).  
780 Long-range electron transport in *Geobacter sulfurreducens* biofilms is redox  
781 gradient-driven. *Proc Natl Acad Sci U S A* 109(38): 15 467–15 472.
- 782 [82] He, X, Chadwick, G, Otero, FJ, Orphan, V, Meile, C (2021). Spatially resolved  
783 electron transport through anode-respiring *Geobacter sulfurreducens* biofilms:  
784 controls and constraints. *ChemElectroChem* (in press).
- 785 [83] Meyer, TE, Kamen, MD (1982). New perspectives on *c*-type cytochromes. *Adv*  
786 *Protein Chem* 35: 105–212.

- 787 [84] Scott Mathews, F (1985). The structure, function and evolution of cytochromes.  
788 *Prog Biophys Mol Biol* 45(1): 1–56.
- 789 [85] Choi, KH, Mima, T, Casart, Y, Rholl, D, Kumar, A, Beacham, IR, *et al.* (2008).  
790 Genetic tools for select-agent-compliant manipulation of *Burkholderia pseudomallei*.  
791 *Appl Environ Microbiol* 74(4): 1064–1075.

## Supplementary figures:

SI figure 1:

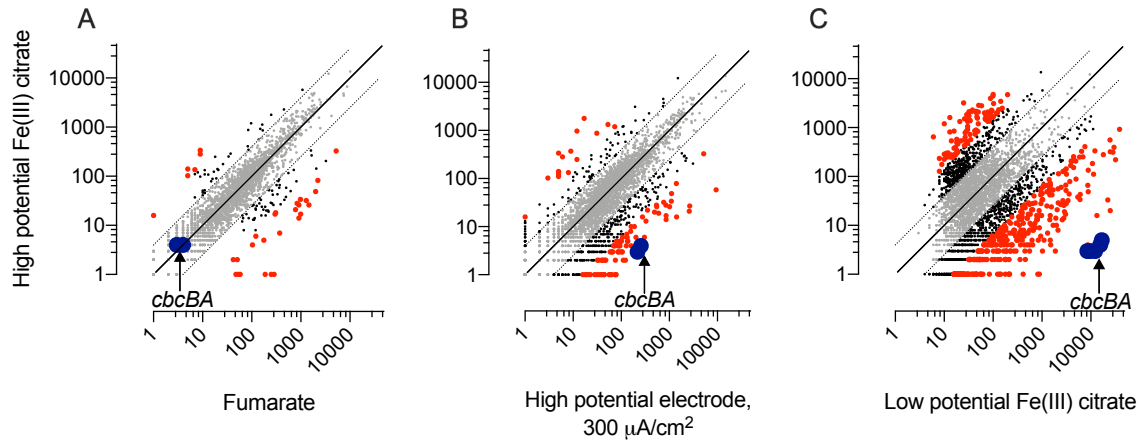

**SI figure 1: RNA-Seq of WT *G. sulfurreducens* grown with different electron acceptors compared to early exponential growth in Fe(III) citrate (30% reduced).** A. Expression of *cbcBA* is barely detectable when both fumarate and high redox potential Fe(III) citrate are the electron acceptor. B. Expression of *cbcBA* increases in electrode-grown biofilms compared to fresh Fe(III) citrate, and C. Expression of *cbcBA* increases to over more than 10 000 RPKM (reads per kilobase mapped) in low potential Fe(III) citrate (70% reduced). Each comparison is the average of two biological replicates. Significant differences greater than 2-fold (black) or 4-fold (red) are highlighted. X and Y axes represent expression values.



SI figure 2 :

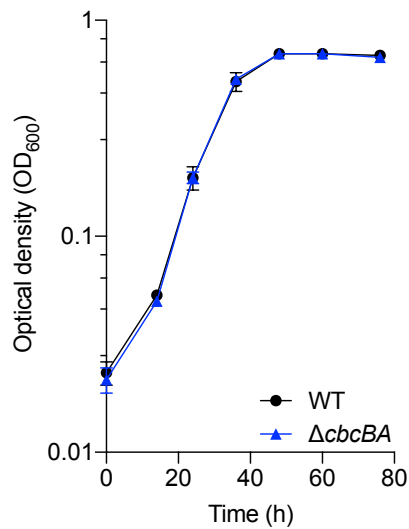

**SI figure 2: Growth of  $\Delta cbcBA$  compared to WT in NB fumarate-acetate (NBFA) medium.**

Fully grown cultures of WT and  $\Delta cbcBA$  in medium containing 40 mM fumarate and 20 mM acetate were inoculated 1:100 v/v, and optical density measured at 600 nm over time.  $\Delta cbcBA$  did not show any growth defects as compared to WT when fumarate was the terminal electron acceptor (mean of three biological replicates, and error is reported as standard error of mean (SEM)).

SI figure 3:

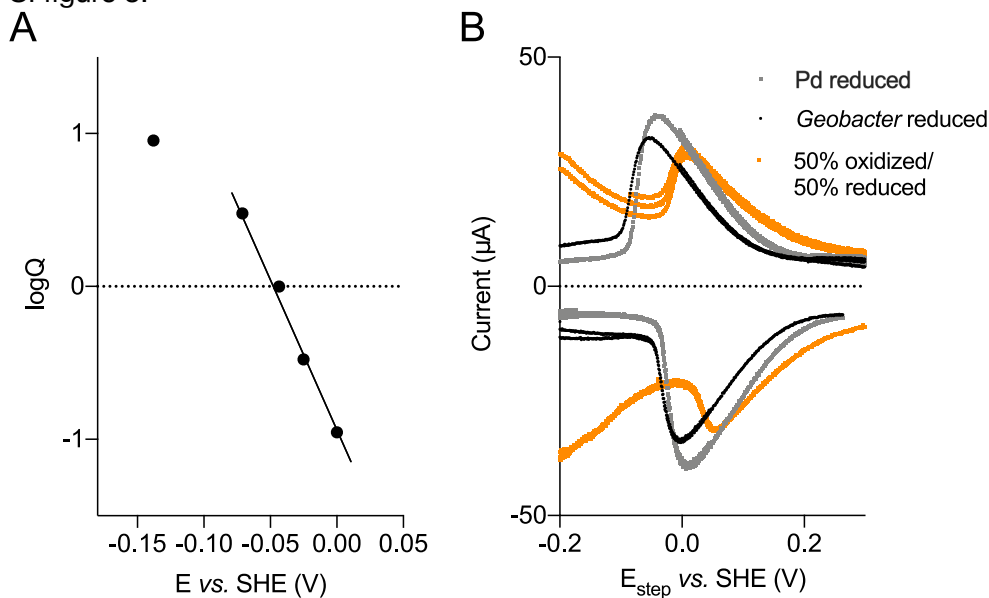

**SI figure 3: Calculating midpoint potential of Fe(III) citrate prepared in our laboratory. A.**

Calculation of midpoint potential of Fe(III) citrate using open circuit potential (OCP) method.

Log(Fe(II)/Fe(III)) ratio of Fe(III) citrate follows Nernstian behavior only in a narrow potential window of about 0.1 V. Midpoint potential of Fe(III) citrate is  $-0.043$  V vs. SHE. B. Comparing redox potential of Fe(III) citrate reduced by *G. sulfurreducens* or reduced by palladium (Pd) using differential pulse voltammetry method. These results show a much lower value of midpoint potential of Fe(III) citrate as previously reported [1] compared to the published values of  $+0.37$  V vs. SHE [2].

SI figure 4:

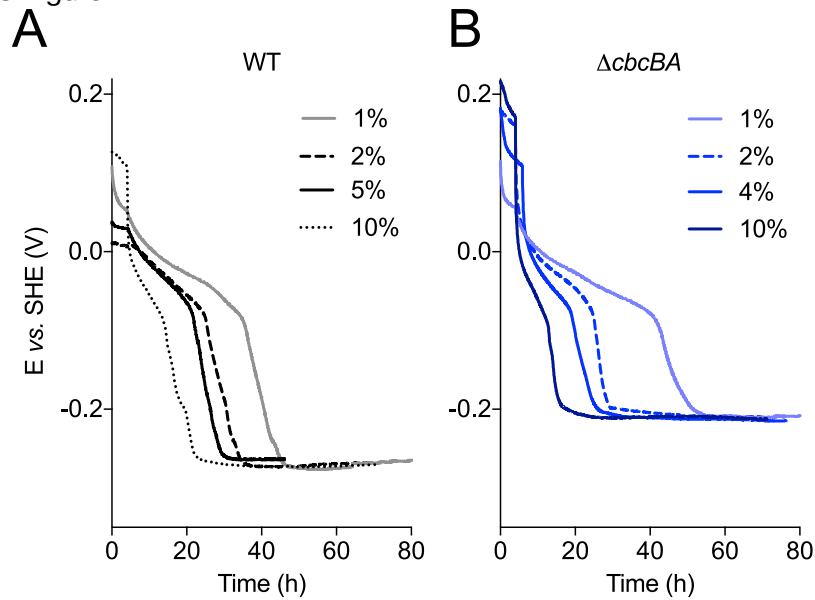

**SI figure 4: The extent of Fe(III) reduction does not change with the percentage of inoculation or the time of incubation.**

A. Redox potential of WT cultures reducing Fe(III) citrate when the percentage of inoculation was varied from 1% v/v to 10% v/v. The redox potential always stabilized at the same value. B. Redox potential of  $\Delta cbcBA$  when inoculation was varied from 1% v/v to 10% v/v.  $\Delta cbcBA$  always ceased reduction at a higher redox potential of  $-0.21$  V vs. SHE, regardless of the percentage of inoculation. Redox potential was monitored for up to 80 h to test if  $\Delta cbcBA$  cultures would lower the redox potential with longer incubation times. In similar experiments, the concentration of Fe(III) citrate was increased to 80 mM, and redox potential profiles followed similar trends, ending at the same final values [1].

SI figure 5:

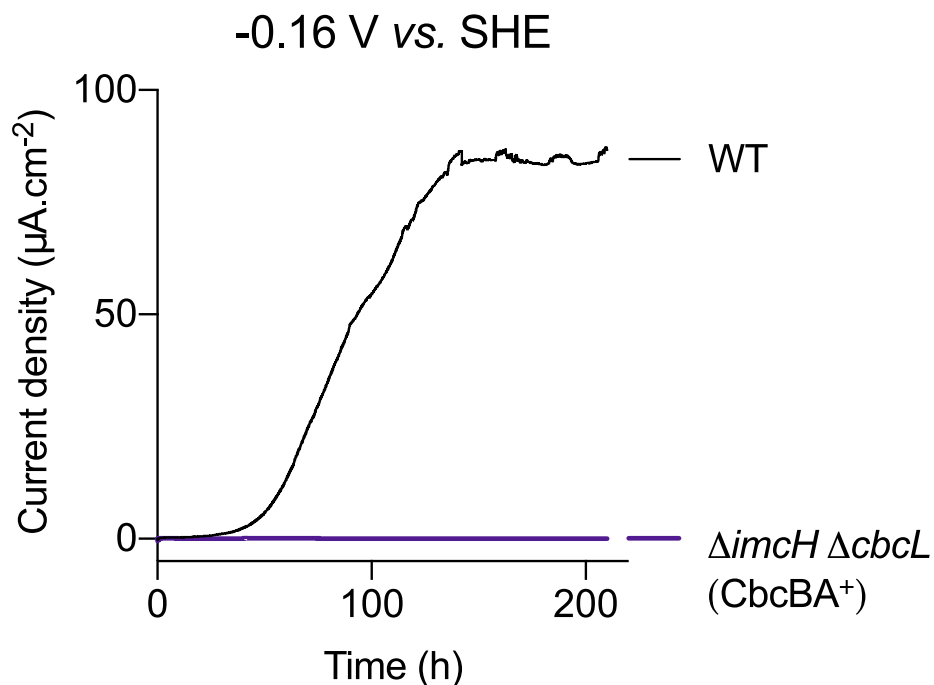

**SI figure 5: The  $\Delta imcH \Delta cbcL$  (CbcBA<sup>+</sup>) strain is unable to support growth on electrodes, even at lower potentials.** When growth of  $\Delta imcH \Delta cbcL$  (CbcBA<sup>+</sup>) was tested with electrodes, shown here poised at  $-0.16$  V vs. SHE as the terminal electron acceptor and acetate as the electron donor, CbcBA<sup>+</sup> cells failed to produce any current as compared to WT. Experiments at  $-0.2$  V also failed to produce current.

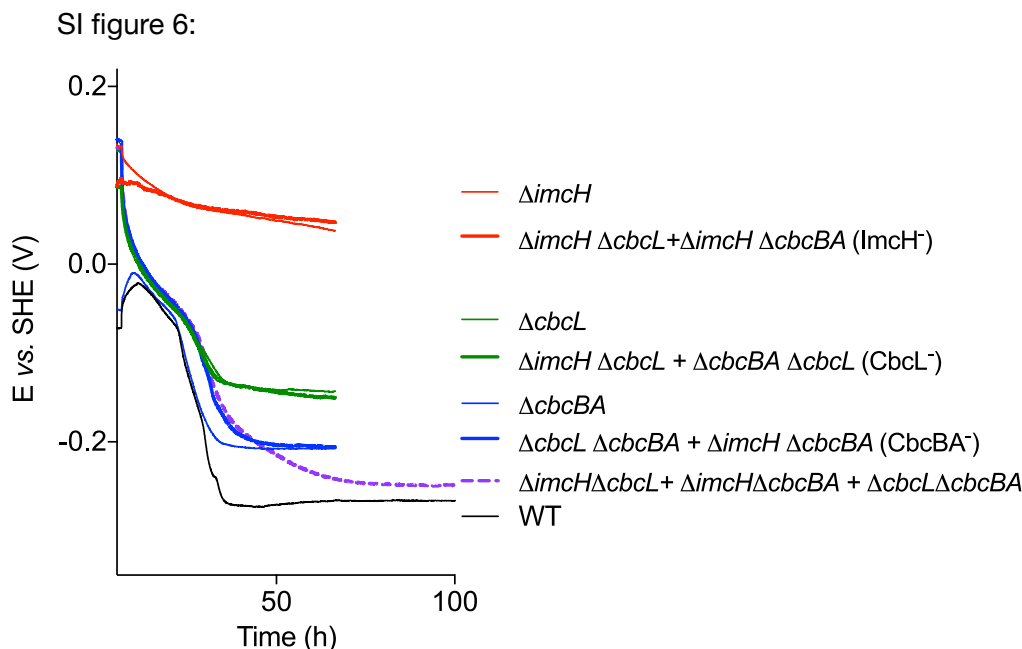

**SI figure 6: Combinations of mutants can ‘work together’, and produce the same final**

**redox potential as mutants lacking the dominant inner membrane cytochrome.** When reactors were inoculated with mixtures of double mutants, such as a mixture of cells lacking  $ImcH$  ( $\Delta imcH \Delta cbcL + \Delta imcH \Delta cbcBA$ ), mixtures still failed to reduce any Fe(III) citrate, just as seen with  $\Delta imcH$ .

When mixtures of cells lacking  $CbcL$  ( $\Delta imcH \Delta cbcL + \Delta cbcL \Delta cbcBA$ ) were inoculated, as one functional copy of  $imcH$  was present, together the mixture lowered redox potential to  $-0.15$  V as observed with  $\Delta cbcL$ .

A combination of mutants, each lacking  $CbcBA$  ( $\Delta cbcL \Delta cbcBA + \Delta imcH \Delta cbcBA$ ) together were able to reduce Fe(III) until redox potential reached  $-0.21$  V vs. SHE, identical to the  $\Delta cbcBA$  phenotype.

When a mixture of all three double mutants ( $\Delta imcH \Delta cbcL + \Delta imcH \Delta cbcBA + \Delta cbcL \Delta cbcBA$ ) was inoculated, redox potential went below the  $-0.21$  V vs. SHE threshold common to all  $\Delta cbcBA$  mutants, but showed a slower rate of redox potential drop near the end of the incubation. A hypothesis for this behavior is the  $\Delta imcH \Delta cbcL$  cells which should induce  $cbcBA$  and finish reduction were unable to generate enough energy to fully produce enough  $cbcBA$ . Representative curves are shown from experiments (N=2) performed in duplicates.

## References

- [1] Levar, CE, Hoffman, CL, Dunshee, AJ, Toner, BM, Bond, DR (2017). Redox potential as a master variable controlling pathways of metal reduction by *Geobacter sulfurreducens*. *ISME J* 11(3): 741–752.
- [2] Straub, KL, Benz, M, Schink, B (2001). Iron metabolism in anoxic environments at near neutral pH. *FEMS Microbiol Ecol* 34(3): 181–186.

Table 1- List of strains and plasmids used in this study.

| Strains or Plasmids                     | Description or relevant genotype                                          | Reference or source    |
|-----------------------------------------|---------------------------------------------------------------------------|------------------------|
| <b><i>G. sulfurreducens</i> strains</b> |                                                                           |                        |
|                                         | Wildtype <i>G. sulfurreducens</i> (WT)                                    | Lab culture collection |
| DB789                                   | $\Delta imcH$                                                             | [38]                   |
| DB868                                   | $\Delta cbcL$                                                             | [32]                   |
| DB790                                   | $\Delta imcH \Delta cbcL$                                                 | This study             |
| DB1674                                  | $\Delta bccR$                                                             | This study             |
| DB1717                                  | $\Delta cbcBA$                                                            | This study             |
| DB1718                                  | $\Delta imcH \Delta cbcBA$                                                | This study             |
| DB1719                                  | $\Delta cbcL \Delta cbcBA$                                                | This study             |
| DB1720                                  | $\Delta imcH \Delta cbcL \Delta cbcBA$                                    | This study             |
| DB1721                                  | $\Delta cbcBA$ Tn7::p0597 <i>cbcBA</i> -Kan                               | This study             |
| DB1725                                  | $\Delta cbcBA$ Tn7::p0597 <i>cbcB</i> -Kan                                | This study             |
| DB1729                                  | $\Delta cbcBA$ Tn7::p0597 <i>cbcA</i> -Kan                                | This study             |
| <b><i>E. coli</i> strains</b>           |                                                                           |                        |
| UQ950                                   | Cloning strain of <i>E. coli</i>                                          |                        |
| S17-1                                   | Conjugation donor strain                                                  |                        |
| MFDpir                                  | Conjugation donor strain                                                  |                        |
| DB2068                                  | S17-1 strain containing pk18mobsacBDGSU0593-94 for <i>cbcBA</i> deletion  | This study             |
| DB1658                                  | S17-1 strain containing pk18mobsacBDGSU0598 for <i>bccR</i> deletion      | This study             |
| DB1325                                  | MFDpir conjugation donor strain containing helper plasmid pmobile-CRISPRi | [85]                   |
| DB2075                                  | UQ950 strain containing pGeo2::p0597 <i>cbcBA</i>                         | This study             |
| DB2076                                  | UQ950 strain containing pGeo2::p0597 <i>cbcB</i>                          | This study             |
| DB2077                                  | UQ950 strain containing pGeo2::p0597 <i>cbcA</i>                          | This study             |
| DB2079                                  | UQ950 strain containing pTn7c147::p0597 <i>cbcBA</i>                      | This study             |
| DB2081                                  | UQ950 strain containing pTn7c147::p0597 <i>cbcB</i>                       | This study             |

|                                   |                                                                                                           |            |
|-----------------------------------|-----------------------------------------------------------------------------------------------------------|------------|
| DB2083                            | UQ950 strain containing pTn7c147::p0597 <i>cbcA</i>                                                       | This study |
| <b>Plasmids</b>                   |                                                                                                           |            |
| pk18mobsacB                       |                                                                                                           |            |
| prk2Geo2                          |                                                                                                           | [38]       |
| pTn7C147                          |                                                                                                           | [39]       |
| pmobile-CRISPRi                   |                                                                                                           | [85]       |
| pDGSU0593-94                      | Flanking regions of GSU0593-GSU0594 in pk18mobsacB                                                        | This study |
| pDGSU0598                         | pk18mobsacB deletion vector containing flanking regions of GSU0598.                                       | This study |
| prk2Geo2::0597 <i>pcbcBA</i>      | Complementation vector of GSU0593-0594 with its predicted native promoter                                 | This study |
| prk2Geo2::0597 <i>pcbcB</i>       | Complementation vector of GSU0593 with its predicted native promoter                                      | This study |
| prk2Geo2::0597 <i>pcbcA</i>       | Complementation vector of GSU0594 with its predicted native promoter                                      | This study |
| pTn7C147::p0597 <i>cbcBA</i> -Kan | Complementation vector subcloned from pGeo2 expressing <i>cbcBA</i> under the control of native promoter. | This study |
| pTn7C147::p0597 <i>cbcB</i> -Kan  | Complementation vector subcloned from pGeo2 expressing <i>cbcB</i> under the control of native promoter.  | This study |
| pTn7C147::p0597 <i>cbcA</i> -Kan  | Complementation vector subcloned from pGeo2 expressing <i>cbcA</i> under the control of native promoter.  | This study |



Table 2- Primers used in this study.

| <b>Deletion</b>                      | <b>Sequence (5'-3')</b>                            | <b>Restriction enzyme</b> |
|--------------------------------------|----------------------------------------------------|---------------------------|
| GSU0593-94 U1F KJ112                 | CTAATAAGCTTGGACCGGCTCCCTT<br>GACCTT                | HindIII                   |
| GSU0593-94 U2R KJ105                 | GTGCTGTCGCTCCTCGCGCCCATGT<br>GGGATGGCTGGGAA        |                           |
| GSU0593-94 D3F KJ106                 | TTCCCAGCCATCCCACATGGGCGCG<br>AGGAGCGACAGCAC        |                           |
| GSU0593-94 D4R KJ107                 | GCTACGAATTCGGCCGGCGAAAGAT<br>ATCGCCA               | EcoRI                     |
| GSU0598 U1F CHC652                   | AGTCGTCTAGACAGTCCCTTGACCA<br>TCGCTGC               | XbaI                      |
| GSU0598 U2R CHC653                   | GCAATGCCTGAAAGTTGGGACGCTC<br>CCGGATAATCGCTTCATCGTC |                           |
| GSU0598 D3F CHC654                   | GACGATGAAGCGATTATCCGGGAGC<br>GTCCCAACTTTCAGGCATTGC |                           |
| GSU0598 D4R CHC655                   | AGACTAAGCTTIGATCGTCAAAGAGA<br>CCCAGCGC             | HindIII                   |
| <b>Confirmation of gene deletion</b> |                                                    |                           |
| GSU0593-94 Uflank F KJ110            | CACGTGTACATGGAGAGGTGCA                             |                           |
| GSU0593-94 Dflank R KJ111            | GCTCATGCTCTTCGCAGCGA                               |                           |
| GSU0598 Uflank CHC656                | CGTTTCGTTGCCCGATGTTCC                              |                           |
| GSU0598 Dflank CHC657                | CTTGCCTCTCTGGGCGAACTG                              |                           |
| <b>Complementation</b>               |                                                    |                           |
| GSU0593-94 comp 3 F KJ129            | CCAAGCATATGGGCCGCCCCGAC<br>ATCACTT                 | NdeI                      |
| GSU0593-94 comp 4 R KJ130            | CCAAGGAGCTCTTTCGGTCTGGC<br>AGGCGGTGG               | SacI                      |
| GSU0593 comp 5 F KJ131               | CCAAGCATATGACGGGACCTTCAGA<br>TTCCTGAC              | NdeI                      |
| GSU0594 comp 6 R KJ132               | CCAATGCTAGCTCGGCATGCTCGTT<br>ATGGGCG               | NheI                      |

|                             |                                         |      |
|-----------------------------|-----------------------------------------|------|
| GSU0597 promoter F<br>KJ133 | CTTGAGGCGCGCCAGGGGAAGTCA<br>AACCCATTGAC | SgsI |
| GSU0597 promoter R<br>KJ134 | CCAAGCATATGATCCGGAGATGTGAG<br>CCTTTT    | NdeI |
